1

2

3

## **DdcA antagonizes a bacterial DNA damage checkpoint**

4

5

Peter E. Burby, Zackary W. Simmons, Lyle A. Simmons\*

6

Department of Molecular, Cellular, and Developmental Biology, University of Michigan, Ann

7

Arbor, MI 48109, United States.

8

9

\*Corresponding author

10

LAS: Department of Molecular, Cellular, and Developmental Biology, University of Michigan,

11

Ann Arbor, Michigan 48109-1055, United States. Phone: (734) 647-2016, Fax: (734) 647-0881

12

E-mail: [lasimm@umich.edu](mailto:lasimm@umich.edu)

13

Running Title: DdcA inhibits a DNA damage checkpoint

14 **Abstract**

15 Bacteria coordinate DNA replication and cell division, ensuring that a complete set of genetic  
16 material is passed onto the next generation. When bacteria encounter DNA damage or  
17 impediments to DNA replication, a cell cycle checkpoint is activated to delay cell division by  
18 expressing a cell division inhibitor. The prevailing model for bacterial DNA damage checkpoints  
19 is that activation of the DNA damage response and protease mediated degradation of the cell  
20 division inhibitor is sufficient to regulate the checkpoint process. Our recent genome-wide  
21 screens identified the gene *ddcA* as critical for surviving exposure to a broad spectrum of DNA  
22 damage. The *ddcA* deletion phenotypes are dependent on the checkpoint enforcement protein  
23 YneA. We found that expression of the checkpoint recovery proteases could not compensate for  
24 *ddcA* deletion. Similarly, expression of *ddcA* could not compensate for the absence of the  
25 checkpoint recovery proteases, indicating that DdcA function is distinct from the checkpoint  
26 recovery step. Deletion of *ddcA* resulted in sensitivity to *yneA* overexpression independent of  
27 YneA protein levels or stability, further supporting the conclusion that DdcA regulates YneA  
28 through a proteolysis independent mechanism. Using a functional GFP-YneA we found that  
29 DdcA inhibits YneA activity independent of YneA localization, suggesting that DdcA may  
30 regulate YneA access to its target. These results uncover a regulatory step that is important for  
31 controlling the DNA damage checkpoint in bacteria, and suggests that the typical mechanism of  
32 degrading the checkpoint enforcement protein is insufficient to control the rate of cell division in  
33 response to DNA damage.

## 34 **Author Summary**

35 All cells coordinate DNA replication and cell division. When cells encounter DNA damage, the  
36 process of DNA replication is slowed and the cell must also delay cell division. In bacteria, the  
37 process has long been thought to occur using two principle modes of regulation. The first, is  
38 RecA coated ssDNA transmits the signal of DNA damage through inactivation of the repressor  
39 of the DNA damage (SOS) response regulon, which results in expression of a cell division  
40 inhibitor establishing the checkpoint. The second principle step is protease mediated degradation  
41 of the cell division inhibitor relieving the checkpoint. Recent work by our lab and others has  
42 suggested that this process may be more complex than originally thought. Here, we investigated  
43 a gene of unknown function that we previously identified as important for survival when the  
44 bacterium *Bacillus subtilis* is exposed to DNA damage. We found that this gene negatively  
45 regulates the cell division inhibitor, but is functionally distinct from the checkpoint recovery  
46 process. We provide evidence that this gene functions as an antagonist to establishing the DNA  
47 damage checkpoint. Our study uncovers a novel layer of regulation in the bacterial DNA damage  
48 checkpoint process challenging the longstanding models established in the bacterial DNA  
49 damage response field.

## 50 **Introduction**

51 The logistics of the cell cycle are of fundamental importance in biology. All organisms need to  
52 control cell growth, DNA replication, and the process of cell division. In bacteria the initiation of  
53 DNA replication is coupled to growth rate and the cell cycle [1-4]. Bacteria also regulate cell  
54 division in response to DNA replication status through the use of DNA damage checkpoints [5,  
55 6]. The models for the DNA damage response (SOS) were developed based on studies of

56 *Escherichia coli* and subsequently extended to other bacteria. In this model, DNA damage results  
57 in perturbations to DNA replication and the accumulation of ssDNA [7]. The recombinase RecA  
58 is loaded onto ssDNA [8-12], and the resulting RecA/ssDNA nucleoprotein filament induces the  
59 SOS response by activating auto-cleavage of the transcriptional repressor LexA [13]. LexA  
60 inactivation results in increased transcription of genes involved in DNA repair and the DNA  
61 damage checkpoint [14-18]. The DNA damage checkpoint is established by relieving the LexA  
62 dependent repression of a cell division inhibitor that enforces the checkpoint by blocking cell  
63 division [19-22]. Once the checkpoint is established, the delay in cytokinesis provides the cell  
64 with enough time to complete DNA replication, thereby ensuring a complete and accurate copy  
65 of the chromosome is provided to both daughter cells. Over several decades of study, this  
66 overarching model has been consistently demonstrated among bacteria that contain a RecA and  
67 LexA dependent DNA damage checkpoint mechanism [5, 23].

68         Where the DNA damage response varies between bacteria is in the mechanism that  
69 enforces and alleviates the checkpoint. In *E. coli* and closely related Gram-negative bacteria, the  
70 checkpoint is enforced by SulaA, which is a cytoplasmic protein that acts by directly inhibiting  
71 formation of the FtsZ ring at mid cell [20, 24-27]. In many other bacteria the checkpoint is  
72 enforced by a small membrane binding protein [21, 28-31]. In *Caulobacter crescentus*, the small  
73 membrane proteins SidA and DidA inhibit cell division through direct interactions with  
74 components of the essential cell division complex known as the divisome [30, 31]. In other  
75 bacteria the exact mechanism of checkpoint enforcement remains unclear. In the Gram-positive  
76 bacterium *Bacillus subtilis*, the checkpoint enforcement protein YneA is a small protein  
77 containing a transmembrane domain as well as a LysM domain. A previous study found that  
78 several amino acids on one side of the transmembrane alpha helix are important for function,

79 which led the authors to suggest that YneA may also interact with a component of the divisome  
80 [22]. The same study also suggested full length YneA is the active form, and that the  
81 transmembrane domain alone is not sufficient for activity [22]. The mechanism by which YneA  
82 enforces the checkpoint is still unknown.

83         The mechanism of relieving the DNA damage checkpoint has only been identified in two  
84 bacterial species, *E. coli* and *B. subtilis*. Despite the checkpoint mechanisms functioning in  
85 different cellular contexts, the strategy for checkpoint recovery is remarkably similar between  
86 these two organisms. In *E. coli*, Lon protease is the major protease responsible for degrading  
87 Sula [32-34], and the protease ClpYQ appears to play a secondary role [35-37]. In *B. subtilis*,  
88 there are two proteases YlbL, which we rename here to DdcP (DNA damage checkpoint  
89 recovery protease) and CtpA that degrade YneA [38]. In the case of DdcP and CtpA, the former  
90 seems to be the primary protease in minimal media, however during chronic exposure to DNA  
91 damage in rich media both proteases are important and they can functionally replace each other  
92 when overexpressed [38]. DdcP and CtpA are not regulated by DNA damage [38], suggesting  
93 that the proteases act as a buffer to YneA accumulation. Thus, in order for the checkpoint to be  
94 enforced both proteases must be saturated. Following repair of damaged DNA, LexA represses  
95 expression of YneA and the remaining YneA is cleared by DdcP and CtpA allowing cell division  
96 to proceed.

97         Although the DNA damage checkpoint in bacteria is well understood, it is becoming  
98 clear that the process is more complex than the models developed thus far. Work from Goranov  
99 and co-workers demonstrated that the initiation protein and transcription factor DnaA regulates  
100 *ftsL* levels in response to DNA replication perturbations, which contributes to cell filamentation  
101 [39]. Further, our recent report identified several genes not previously implicated in genome

102 maintenance or cell cycle control to be critical for surviving chronic exposure to a broad  
103 spectrum of DNA damage [38]. We identified genes involved in cell division and cell wall  
104 synthesis as well as genes of unknown function that rendered the deletion mutants sensitive to  
105 DNA damage [38]. To understand how the DNA damage response in bacteria is regulated, we  
106 investigated the contribution of one of the unstudied genes *ddcA* (formerly *ysoA*, see below) in  
107 the DNA damage response. We report that DdcA antagonizes YneA action through a proteolysis  
108 independent mechanism. This finding represents a novel regulatory node controlling the DNA  
109 damage checkpoint in bacteria.

## 110 **Results**

### 111 **Deletion of *ddcA* (*ysoA*) results in sensitivity to DNA damage**

112 We recently published a set of genome wide screens using three distinct classes of DNA  
113 damaging agents, uncovering many genes that have not been previously implicated in the DNA  
114 damage response or DNA repair [38]. One gene that conferred a sensitive phenotype to all three  
115 agents tested was *ysoA*, which we rename here to DNA damage checkpoint antagonist (*ddcA*).  
116 DdcA is a protein that is predicted to have three tetratrichoepptide repeats (Fig 1A), which are  
117 often involved in protein-protein interactions, protein complex formation, and virulence  
118 mechanisms in bacteria [40]. In order to better understand the mechanism of the DNA damage  
119 response in *B. subtilis*, we investigated the contribution of DdcA. To begin, we tested the  
120 sensitivity of the *ddcA* deletion to DNA damage. Deletion of *ddcA* resulted in sensitivity to  
121 mitomycin C (MMC) an agent that causes DNA crosslinks and bulky adducts; [41, 42] and  
122 phleomycin a peptide that forms double and single strand DNA breaks [43, 44]. We found that  
123 expression of *P<sub>xyt</sub>-ddcA* from an ectopic locus (*amyE*) was sufficient to complement deletion of

124 *ddcA* with or without inducing expression using xylose (Fig 1B). We conclude that deletion of  
125 *ddcA* results in a *bona-fide* sensitivity to DNA damage.

126 **DNA damage sensitivity of *ddcA* deletion is dependent on *yneA* and independent of**  
127 **nucleotide excision repair.**

128 We asked how DdcA functions in the DNA damage response. Our observation that a *ddcA*  
129 deletion allele results in sensitivity to several DNA damaging agents is similar to the result of  
130 deleting the checkpoint recovery proteases. Given that our prior study [38] showed that DNA  
131 damage phenotypes in checkpoint recovery protease mutants depend on the checkpoint  
132 enforcement protein, *yneA*, we asked whether the same was true for *ddcA*. We found that in the  
133 *ddcA* deletion background, deletion of *yneA* was indeed capable of rescuing sensitivity to MMC  
134 (Fig S1). We also tested for a genetic interaction with nucleotide excision repair, reasoning that  
135 the absence of nucleotide excision repair would result in increased *yneA* expression and  
136 increased sensitivity in the *ddcA* deletion. Indeed, deletion of *uvrAB*, genes coding for  
137 components of nucleotide excision repair [45], resulted in hypersensitivity to MMC (Fig S1).  
138 These data, together with the initial observation of general DNA damage sensitivity, rule out a  
139 role for DdcA in nucleotide excision repair and suggest that DdcA functions in some aspect of  
140 regulating cell division during the DNA damage response.

141 **DdcA functions independent of DNA damage checkpoint recovery proteases**

142 Based on the observation that sensitivity to DNA damage in a  $\Delta$ *ddcA* mutant was rescued by  
143 deletion of *yneA*, similar to our observations with the checkpoint recovery proteases [38], we  
144 hypothesized that DdcA could function within the checkpoint recovery pathway. This hypothesis  
145 predicts that deletion of *ctpA* or *ddcP* (*ylbL*) would be epistatic to deletion of *ddcA*. In contrast,

146 we observed that deletion of *ddcA* in a *ctpA* or *ddcP* mutant resulted in increased sensitivity to  
147 MMC (Fig 2A). To test this hypothesis further, we tested the effect of deletion of *ddcA* in a  
148  $\Delta ddcP$ ,  $\Delta ctpA$  double mutant on MMC sensitivity. We found that deletion of *ddcA* resulted in  
149 increased MMC sensitivity relative to the double protease mutant (Fig 2B), suggesting that DdcA  
150 functions independently of both DdcP and CtpA. We then asked if *yneA* was responsible for the  
151 phenotype of  $\Delta ddcA$  in the absence of the checkpoint recovery proteases. Strikingly, we found  
152 that the sensitivity of the triple mutant was mostly dependent on *yneA*, but at elevated  
153 concentrations of MMC, there was a slight but reproducible difference when *ddcA* was deleted in  
154 the  $\Delta ddcP$ ,  $\Delta ctpA$ ,  $\Delta yneA::loxP$  mutant background (Fig 2B). Taken together, with these data we  
155 suggest that DdcA functions independently of checkpoint recovery proteases, but negatively  
156 regulates the checkpoint enforcement protein YneA.

157 In our previous study we found that the checkpoint recovery proteases could substitute for each  
158 other [38], we therefore asked if DdcA could function in place of the checkpoint recovery  
159 proteases or if the proteases could function in place of DdcA. To test this idea, we overexpressed  
160 *ddcP* and *ctpA* in a  $\Delta ddcA$  mutant and found that neither protease could rescue a *ddcA* deletion  
161 phenotype (Fig 3A). We also found that expression of *ddcA* in the double protease mutant could  
162 not rescue the MMC sensitive phenotype (Fig 3B). Further, expression of *ddcP* or *ctpA* were  
163 each able to partially complement the phenotype of the triple mutant, but expression of *ddcA* had  
164 no effect at higher concentrations of MMC (Fig 3B). As a control, we verified that  
165 overexpression of *ddcA* using high levels of xylose (0.5% xylose) could complement a  $\Delta ddcA$   
166 mutant (Fig S2). We also found that at lower concentrations of MMC, expression of *ddcA* could  
167 rescue the *ddcA* deficiency of the triple mutant resulting in a phenotype indistinguishable from  
168 the double protease mutant (Fig 3C). Given that DdcA cannot substitute for DdcP and CtpA, we



169 considered the possibility that YneA protein levels increased in the absence of *ddcA*. We tested  
170 this by monitoring YneA protein levels following MMC treatment and after recovering from  
171 MMC treatment for two hours. Deletion of *ddcA* alone did not result in a detectable difference in  
172 YneA protein levels compared to WT (Fig S3). Further, deletion of *ddcA* in the double protease  
173 mutant also did not result in an increase in YneA protein levels relative to the double protease  
174 mutant with *ddcA* intact (Fig S3). With these data we conclude that DdcA has a function distinct  
175 from that of the checkpoint recovery proteases. We also conclude that DdcA does not regulate  
176 YneA protein abundance.

#### 177 ***ddcA* deletion results in sensitivity to *yneA* overexpression independent of YneA stability**

178 Prior work established that overexpression of *yneA* resulted in growth inhibition [21, 22]. Indeed,  
179 we found that the double checkpoint recovery protease mutant was considerably more sensitive  
180 than the wild type strain to *yneA* overexpression [38]. Given that DdcA has a function distinct  
181 from DdcP and CtpA and that YneA protein levels did not increase when *ddcA* was deleted, we  
182 initially hypothesized that a *ddcA* mutant would not be sensitive to *yneA* overexpression. In  
183 contrast, we found that the  $\Delta$ *ddcA* mutant was more sensitive to *yneA* overexpression than WT  
184 (Fig 4A), and that deletion of *ddcA* in the double protease mutant background resulted in  
185 exquisite sensitivity to *yneA* overexpression (Fig 4A). We asked whether YneA protein levels  
186 changed under these conditions, and again there was no detectable difference when *ddcA* was  
187 deleted alone or when combined with the double protease mutant (Fig 4B). We also considered  
188 the possibility that DdcA could affect the stability of YneA rather than the overall amount. To  
189 test this idea, we performed a translation shut-off experiment and monitored YneA stability over  
190 time. We induced expression of *yneA* in the double protease mutant with and without *ddcA* and  
191 blocked translation. We found that YneA protein abundance decreased at a similar rate

192 regardless of whether *ddcA* was present (Fig 4C). We conclude that DdcA negatively regulates  
193 YneA independent of protein stability.

#### 194 **DdcP and CtpA are membrane anchored with extracellular protease domains**

195 The observation that DdcA and the checkpoint recovery proteases have distinct functions led us  
196 to ask where these proteins are located within the cell. YneA is a membrane protein with the  
197 majority of the protein located extracellularly [22]. We hypothesized that proteases DdcP and  
198 CtpA should be similarly localized if YneA is a direct substrate. We used the transmembrane  
199 prediction software TMHMM [46] and found that both DdcP and CtpA were predicted to have  
200 an N-terminal transmembrane domain, as reported previously [47]. We tested this prediction  
201 directly using a subcellular fractionation assay [48]. We found that DdcP and CtpA were present  
202 predominantly in the membrane fraction (Fig 5A). DdcP is predicted to have a signal peptide  
203 cleavage site [47], however, we did not detect DdcP in the media (Fig 5A), suggesting that DdcP  
204 is membrane anchored and not secreted. The membrane topology of DdcP and CtpA could put  
205 the protease domains inside or outside of the cell (Fig 5B). To determine their location we used a  
206 protease sensitivity assay [Fig 5B; 49]. Cells were treated with lysozyme, followed by incubation  
207 with proteinase K. We found that DdcP and CtpA were digested by proteinase K, but the  
208 intracellular protein DnaN was not (Fig 5C). In control reactions we added Triton X-100 to  
209 disrupt the plasma membrane, which rendered all three proteins susceptible to proteinase K (Fig  
210 5C). To verify that the N-terminal transmembrane domain is required for DdcP and CtpA to be  
211 extracellular we created N-terminal truncations (Fig 5D), and repeated the proteinase K  
212 sensitivity assay. With these variants, DdcP and CtpA should be locked inside the cell, and  
213 indeed, both N-terminal truncations were now resistant to proteinase K similar to DnaN (Fig 5E).

214 We conclude that DdcP and CtpA are tethered to the plasma membrane through N-terminal  
215 transmembrane domains and their protease domains are extracellular (Fig 5B, left panel).

### 216 **DdcA is an intracellular protein**

217 YneA has a transmembrane domain and has previously been shown to be localized to the plasma  
218 membrane [22], and we now show that DdcP and CtpA are membrane anchored as well. To  
219 better understand how DdcA limits YneA activity, we asked where DdcA was located. We were  
220 unable to find DdcA detected in any previous proteomic experiments that interrogated cytosolic  
221 or extracellular proteins [50-52]. The fact that DdcA has not been detected using proteomics is  
222 not surprising given that DdcA is likely to be present at low levels because complementation of  
223 the *ddcA* deletion allele occurs from the  $P_{xyI}$  promoter in the absence of inducer (Fig 1). Also, the  
224 secretome of *B. subtilis* was analyzed using bioinformatics and reported [47], however, DdcA  
225 was not predicted to be secreted through the canonical secretion mechanisms. Therefore, we  
226 turned to other bioinformatics prediction programs to determine if DdcA would be targeted to the  
227 membrane or secreted. We used several programs to predict the subcellular location of DdcA  
228 [46, 53-55]. The transmembrane prediction programs TMHMM [46] and TMPred [53] did not  
229 predict a transmembrane domain in DdcA. The program SecretomeP, which predicts the  
230 likelihood that a protein is secreted through a non-canonical mechanism [54], rendered a “SecP  
231 score” of 0.068654, which is well below the threshold of 0.5 for secreted proteins and more  
232 similar to cytosolic proteins. Similarly, the program PSORTb (v3.0.2), which predicts the  
233 subcellular location of proteins [55], predicted that DdcA would reside in the cytosol. Taken  
234 together, DdcA is predicted to be present in the cytosol.

235           In order to experimentally determine the location of DdcA, we generated GFP fusions to  
236 the N- and C-termini of DdcA. We tested whether GFP-DdcA and DdcA-GFP were functional  
237 by assaying for the ability to complement a *ddcA* deletion. We found that GFP-DdcA was  
238 capable of complementing a *ddcA* deletion in the presence or absence of xylose for induced  
239 expression (Fig 6A), similar to that observed with untagged DdcA (Fig 1). In contrast, DdcA-  
240 GFP was partially functional, because complete complementation was only observed when  
241 expression of *ddcA-gfp* was induced using xylose, but not in the absence of xylose (Fig 6A). As a  
242 control we asked if we could detect free GFP via Western blotting using GFP specific antiserum.  
243 We did not detect the fusion proteins in lysates if expression was not induced using xylose. We  
244 found that both DdcA fusions were detectable at their approximate molecular weight of 67.6 kDa  
245 when induced with 0.05% xylose (Fig 6B), though we did see that the C-terminal fusion had a  
246 slight increase in mobility (Figure 6B, arrowhead). Importantly, we did not detect a significant  
247 band near 25 kDa, the approximate size of GFP (Fig 6B), suggesting that GFP is not cleaved  
248 from DdcA. We did detect a very faint proteolytic fragment (Fig 6B, arrow) that seemed to occur  
249 during the lysis procedure. After establishing the functionality and integrity of the GFP-DdcA  
250 fusion we chose to visualize DdcA localization via fluorescence microscopy.

251           To compare the background fluorescence of *B. subtilis* cells, we imaged WT (PY79) cells  
252 under the same conditions as the GFP-DdcA fusion strain. We found a low level of background  
253 fluorescence in WT cells, and when a line scan of fluorescence intensity through a cell was  
254 plotted there was a very slight increase in signal intensity in the span between the fluorescent  
255 membrane peaks (Fig 6C). The GFP-DdcA fusion was detectable throughout the cell at very low  
256 levels in the absence of xylose induction, with the intensity being slightly greater than WT cells  
257 (Fig 6C). We then imaged cells under conditions in which *gfp-ddcA* expression was induced with

258 0.05% xylose. This experiment shows that GFP-DdcA was found throughout the cytosol, and the  
259 scan of fluorescence intensity was significantly greater than WT (Fig 6C). We observed that the  
260 partially functional DdcA-GFP fusion was also present diffusely throughout the cytosol (Fig  
261 S3A). Finally, we tested DdcA localization using subcellular fractionation. We found that GFP-  
262 DdcA was detectable in the membrane and cytosolic fractions (Fig 6D), and similar results were  
263 obtained with DdcA-GFP (Fig S4B). As controls, we found that DdcP was found in the  
264 membrane fraction and not the cytosolic fraction (Fig 6D), and a cross-reacting protein detected  
265 by our GFP antiserum was found in the cytosol and not the membrane fractions (Fig 6D). Taken  
266 together, DdcA appears to be an intracellular protein that is primarily located in the cytosol with  
267 some molecules localized to the membrane. Thus, DdcA and the checkpoint recovery proteases  
268 are separated in space by the plasma membrane, which could partially explain why these factors  
269 have distinct functions.

### 270 **DdcA inhibits YneA activity**

271 DdcA appears to regulate YneA activity via a protease independent mechanism. We initially  
272 hypothesized that DdcA could interact with YneA to inhibit its activity. To test this hypothesis,  
273 we assayed for a protein-protein interaction using a bacterial two-hybrid, but did not detect an  
274 interaction (Fig S5). We then asked whether DdcA affected the localization of YneA. To address  
275 this question, we built a strain in which GFP was fused to the N-terminus of YneA, and placed  
276 *gfp-yneA* under the control of the xylose-inducible promoter  $P_{xyl}$ . We expressed both YneA and  
277 GFP-YneA in strains lacking *ddcA*, the checkpoint recovery proteases, or the triple mutant and  
278 found that GFP-YneA is able to inhibit growth to a similar extent as YneA (Fig 7A), suggesting  
279 that the GFP fusion is functional. We visualized GFP-YneA following induction with 0.1%  
280 xylose for 30 minutes. We found that GFP-YneA localized to the mid-cell, while also

281 demonstrating diffuse intracellular fluorescence (Fig 7B), which we suggest is free GFP  
282 generated by the checkpoint recovery proteases after YneA cleavage. Deletion of *ddcA* alone did  
283 not affect GFP-YneA localization, with both WT and  $\Delta ddcA$  strains having similar mid-cell  
284 localization frequencies (Fig 7B). The absence of both checkpoint recovery proteases resulted in  
285 puncta throughout the plasma membrane (Fig 7B). Intriguingly, deletion of *ddcA* in addition to  
286 the checkpoint recovery proteases resulted in severe cell elongation, however, GFP-YneA  
287 localization was not affected (Fig 7B). The difference in cell length was quantified by measuring  
288 the cell length of at least 600 cells following growth in the presence of 0.1% xylose for 30  
289 minutes. The cell length distributions of strains lacking *ddcA* or *ddcP* and *ctpA* were no different  
290 from the WT control (Fig 7C). The distribution for the strain lacking *ddcA*, *ddcP*, and *ctpA* had a  
291 significant skew to the right indicating greater cell lengths (Fig 7C). The percentage of cells  
292 greater than 5  $\mu\text{m}$  in length was approximately 22% for the triple mutant and significantly greater  
293 than the other three strains in which approximately 1% of cells were greater than 5  $\mu\text{m}$  (Table 1).  
294 As a control, we determined the cell length distributions prior to xylose addition and found all  
295 four strains to have similar cell length distributions in the absence of xylose (Fig 7C). We  
296 conclude that DdcA inhibits the activity of YneA without affecting its localization.

## 297 **Discussion**

### 298 **A model for DNA damage checkpoint activation and recovery**

299 The DNA damage checkpoint in bacteria was discovered through seminal work using *E. coli* as a  
300 model organism [7]. An underlying assumption in the models is that the input signal of RecA  
301 coated ssDNA and the affinity of LexA for its binding site is sufficient to control the rate of cell  
302 division in response to DNA damage. A finding that the initiator protein, DnaA, controls the

303 transcription of *ftsL*, and as a result the rate of cell division, in response to replication stress, gave  
304 a hint that coordination of cell division and DNA replication may be more complex [39]. Here,  
305 we elaborate on the complexity of regulating cell division in response to DNA damage by  
306 uncovering a DNA damage checkpoint antagonist, DdcA (Fig 8). In response to DNA damage,  
307 the repressor LexA is inactivated, which results in expression of *yneA*. Accumulation of YneA  
308 must saturate two proteases, DdcP and CtpA, and overcome DdcA-dependent inhibition in order  
309 to block cell division. After DNA repair occurs and the integrity of the DNA is restored the SOS  
310 response is terminated, LexA represses *yneA* expression and the checkpoint recovery proteases  
311 degrade the remaining YneA. Together, our results uncover a unique strategy in regulating a  
312 DNA damage checkpoint in bacteria.

### 313 **How does DdcA inhibit YneA activity?**

314 Our results are most supportive of DdcA acting as an antagonist to YneA, rather than functioning  
315 in checkpoint recovery. Two lines of evidence support this model. First, DdcA does not affect  
316 YneA protein levels or stability (Figs S3 & 4). Second, if DdcA was involved in checkpoint  
317 recovery, we would predict that expression of one of the checkpoint proteases would be able to  
318 compensate for deletion of *ddcA*. Instead, we found that the checkpoint recovery proteases and  
319 DdcA cannot replace each other (Fig 3). As a result, we hypothesize that DdcA acts by  
320 preventing YneA from accessing its target. We tested for an interaction between YneA and  
321 DdcA using a bacterial two-hybrid assay and we were unable to identify an interaction with full  
322 length or a cytoplasmic “locked” YneA mutant lacking its transmembrane domain (Fig S5). We  
323 also ruled out the hypothesis that DdcA affects the subcellular localization of YneA using a  
324 GFP-YneA fusion, which had similar localization patterns with and without *ddcA* (Fig 7B).

325 Taken together, all these results support a model where DdcA functions downstream of YneA by  
326 preventing access to the target of YneA.

327 The YneA target that results in the inhibition of cell division is unknown. YneA is a  
328 membrane bound cell division inhibitor. This class of inhibitor in bacteria is typified as being a  
329 small protein that contains an N-terminal transmembrane domain, and they have been identified  
330 in several species [21, 28-31, 56]. In *Caulobacter crescentus*, the cell division inhibitors SidA  
331 and DidA inhibit the activity of FtsW/N, which are components of the divisome [30, 31]. A  
332 recent study in *Staphylococcus aureus* identified a small membrane division inhibitor, SosA, and  
333 its target appears to be PBP1 [56], which is involved in peptidoglycan synthesis at the septum  
334 [57, 58]. It is tempting to speculate that YneA could target an essential component of the cell  
335 division machinery, because previous work found a conserved face of the transmembrane  
336 domain that is required for activity [22]. Still, there are fundamental differences between YneA  
337 and other membrane bound cell division inhibitors. YneA has two major predicted features: an  
338 N-terminal transmembrane domain and a C-terminal LysM domain, and both have been found to  
339 be required for full activity [22]. The other cell division inhibitors SidA, DidA, and SosA do not  
340 have a LysM domain [30, 31, 56]. LysM domains bind to the peptidoglycan (PG) cell wall and  
341 many proteins containing LysM domains have cell wall hydrolase activity [59]. Thus, another  
342 possibility is that the YneA acts directly on the cell wall to inhibit cell division. Intriguingly, the  
343 cell division inhibitor of *Mycobacterium tuberculosis*, Rv2719c, also contains a LysM domain  
344 and was shown to have cell wall hydrolase activity *in vitro* [28]. The localization of GFP-YneA  
345 is also similar to previous reports of fluorescent vancomycin labeling of nascent peptidoglycan  
346 synthesis [Fig 7B; 60, 61]. The difficulty with the model of targeting cell wall synthesis directly  
347 is that it is not clear how DdcA would prevent YneA activity given that these proteins are



348 separated by the plasma membrane. One explanation is that DdcA directly or indirectly affects  
349 the folding of YneA as it is transported across the membrane, resulting in a form of YneA that is  
350 not competent for PG binding. DdcA contains a TPR domain and proteins containing TPR  
351 domains have been found to have chaperone activity and act as co-chaperones [62]. It is  
352 intriguing that *ddcA* is just upstream of trigger factor (*tig*) in the *B. subtilis* genome, and this  
353 organization is conserved in some bacterial species. In any case, to fully understand the function  
354 of DdcA, the target of YneA would need to be elucidated first.

### 355 **Negative regulation of YneA occurs through three distinct mechanisms**

356 The checkpoint recovery proteases and DdcA utilize multiple strategies to inhibit YneA.  
357 Although both DdcP and CtpA degrade YneA, they are very different proteases. DdcP has a Lon  
358 peptidase domain and a PDZ domain, whereas CtpA has an S41 peptidase domain and a PDZ  
359 domain. Intriguingly, the PDZ domains of DdcP and CtpA have different functions *in vivo* and  
360 show homology to different classes of PDZ domains found in proteases in *E. coli* (FigS6, see  
361 supplemental results). Thus, it appears that the proteases utilize different strategies to degrade  
362 YneA. DdcA is unique, because it acts as an antagonist without affecting protein abundance,  
363 stability, or localization. Also, DdcA appears to function prior to checkpoint establishment and  
364 not in recovery, whereas the proteases perform both functions. Together, DdcA, DdcP, and CtpA  
365 likely provide a buffer to expression of YneA, thereby setting a threshold of YneA for  
366 checkpoint enforcement.

367         The discovery of a specific DNA damage checkpoint antagonist brings the total known  
368 proteins to negatively regulate YneA to three, which begs the question: why isn't a single  
369 protease sufficient? One explanation is that the process can be fine-tuned. By utilizing several

370 proteins, the process has more nodes for regulation, which is advantageous at least for *B. subtilis*.  
371 A second explanation is that this strategy evolved in response to more efficient DNA repair. The  
372 SOS-regulon is highly conserved in bacteria and yet the checkpoint strategies vary significantly  
373 [23]. If an organism evolves a more efficient DNA repair system, the same level of checkpoint  
374 protein will no longer be required. This could be the explanation for the highly divergent nature  
375 of cell division inhibitors in bacteria as well as the explanation for the complex control over  
376 YneA found in *B. subtilis*.

## 377 **Materials and Methods**

### 378 **Bacteriological and molecular methods**

379 All *B. subtilis* strains are derivatives of PY79 [63], and are listed in Table 2. Construction of  
380 individual strains is detailed in the supplemental methods using double cross-over recombination  
381 or CRISPR/Cas9 genome editing as previously described [38, 64]. *B. subtilis* strains were grown  
382 in LB (10 g/L NaCl, 10 g/L tryptone, 5 g/L yeast extract) or S7<sub>50</sub> media [1x S7<sub>50</sub> salts (diluted  
383 from 10x S7<sub>50</sub> salts: 104.7g/L MOPS, 13.2 g/L, ammonium sulfate, 6.8 g/L monobasic potassium  
384 phosphate, pH 7.0 adjusted with potassium hydroxide), 1x metals (diluted from 100x metals: 0.2  
385 M MgCl<sub>2</sub>, 70 mM CaCl<sub>2</sub>, 5 mM MnCl<sub>2</sub>, 0.1 mM ZnCl<sub>2</sub>, 100 µg/mL thiamine-HCl, 2 mM HCl,  
386 0.5 mM FeCl<sub>3</sub>), 0.1% potassium glutamate, 40 µg/mL phenylalanine, 40 µg/mL tryptophan]  
387 containing either 2% glucose or 1% arabinose as indicated in each method. Plasmids used in this  
388 study are listed in Table S1. Individual plasmids were constructed using Gibson assembly as  
389 described previously [38, 65]. The details of plasmid construction are described in the  
390 supplemental methods. Oligonucleotides used in this study are listed in Table S2 and were  
391 obtained from Integrated DNA technologies (IDT). Antibiotics for selection in *B. subtilis* were

392 used at the following concentrations: 100 µg/mL spectinomycin, 5 µg/mL chloramphenicol, and  
393 0.5 µg/mL erythromycin. Antibiotics used for selection in *Escherichia coli* were used at the  
394 following concentrations: 100 µg/mL spectinomycin, 100 µg/mL ampicillin, and 50 µg/mL  
395 kanamycin. Mitomycin C (Fisher bioreagents) and phleomycin (Sigma) were used at the  
396 concentrations indicated in the figures and legends.

### 397 **Spot titer assays**

398 Spot titer assays were performed as previously described [38]. Briefly, *B. subtilis* strains were  
399 grown on an LB agar plate at 30°C overnight and a single colony was used to inoculate a liquid  
400 LB culture. The cultures were grown at 37°C to an OD<sub>600</sub> between 0.5 and 1. Cultures were  
401 normalized to an OD<sub>600</sub> = 0.5, and serial dilutions were spotted on to LB agar media containing  
402 the drugs as indicated in the figures. Plates were grown at 30°C overnight (16-20 hours). All spot  
403 titer assays were performed at least twice.

### 404 **Western blotting**

405 Western blotting experiments for YneA were performed essentially as described [38]. Briefly,  
406 for the MMC recovery assay, samples of an OD<sub>600</sub> = 10 were harvested via centrifugation and  
407 washed twice with 1x PBS pH 7.4 and re-suspended in 400 µL of sonication buffer (50 mM Tris,  
408 pH 8.0, 10 mM EDTA, 20% glycerol, 2x Roche protease inhibitors, and 5 mM PMSF) and lysed  
409 via sonication. SDS sample buffer was added to 2x and samples (10 µL) were incubated at  
410 100°C and separated using 10% SDS-PAGE (DnaN) or 16.5% Tris-Tricine SDS-PAGE (YneA).  
411 Proteins were transferred to a nitrocellulose membrane using the BioRad transblot-turbo  
412 following the manufacturer's instructions. Membranes were blocked in 5% milk in TBST for 1  
413 hour at room temperature. Membranes were incubated with YneA antiserum at a 1:3000 dilution

414 in 2% milk in TBST for two hours at room temperature or at 4°C overnight. Membranes were  
415 washed three times with TBST for five minutes each and secondary antibodies (LiCor goat anti-  
416 Rabbit-680LT; 1:15000) were added and incubated for one hour at room temperature.  
417 Membranes were washed three times with TBST for five minutes each. Images of membranes  
418 were captured using the LiCor Odyssey.

419 For overexpression of YneA, cultures of LB were inoculated at an  $OD_{600} = 0.05$  and  
420 incubated at 30°C until an  $OD_{600}$  of about 0.2 (about 90 minutes). Xylose was added to 0.1% and  
421 cultures were incubated at 30°C for 2 hours. Samples of an  $OD_{600} = 25$  were harvested and re-  
422 suspended in 500  $\mu$ L sonication buffer as above. All subsequent steps were performed as  
423 described above.

424 For GFP-DdcA and DdcA-GFP, samples of an  $OD_{600} = 1$  were harvested from LB +  
425 0.05% xylose cultures via centrifugation and washed twice with 1x PBS pH 7.4. Samples were  
426 re-suspended in 100  $\mu$ L 1x SMM buffer (0.5 M sucrose, 0.02 M maleic acid, 0.02 M  $MgCl_2$ ,  
427 adjusted to pH 6.5) containing 1 mg/mL lysozyme and 2x Roche protease inhibitors. Samples  
428 were incubated at room temperature for one hour and SDS sample buffer was added to 1x and  
429 incubated at 100°C for 7 minutes. Samples (10  $\mu$ L) were separated via 10% or 4-20% SDS-  
430 PAGE. All subsequent steps were as described above, except GFP antisera (lot 1360-ex) was  
431 used at a 1:5000 dilution at 4°C overnight.

### 432 **YneA stability assay**

433 Cultures of LB were inoculated at an  $OD_{600} = 0.05$  and incubated at 30°C until an  $OD_{600}$  of about  
434 0.2 (about 90 minutes). Xylose was added to 0.1% and cultures were incubated at 30°C for 2  
435 hours. To stop translation, erythromycin was added to 50  $\mu$ g/mL and samples ( $OD_{600} = 10$ ) were

436 taken at 0, 60, 120, and 180 minutes (the strains for this experiment contain the chloramphenicol  
437 resistant gene, *cat*, which prevents chloramphenicol from being used). Western blotting was  
438 performed as described above.

#### 439 **Subcellular fractionation**

440 Fractionation experiments were performed as described previously [48]. A cell pellet equivalent  
441 to 1 mL OD<sub>600</sub> = 1 was harvested via centrifugation (10,000 g for 5 minutes at room  
442 temperature), and washed with 250 µL 1x PBS. Protoplasts were generated by resuspension in  
443 100 µL 1x SMM buffer (0.5 M sucrose, 0.02 M maleic acid, 0.02 M MgCl<sub>2</sub>, adjusted to pH 6.5)  
444 containing 1 mg/mL lysozyme and 1x Roche protease inhibitors at room temperature for 2 hours.  
445 Protoplasts were pelleted via centrifugation: 5,000 g for 6 minutes at room temperature.  
446 Protoplasts were re-suspended in 100 µL TM buffer (20 mM Tris, pH 8.0, 5 mM MgCl<sub>2</sub>, 40  
447 units/mL DNase I (NEB), 200 µg/mL RNase A (Sigma), 0.5 mM CaCl<sub>2</sub>, and 1x Roche protease  
448 inhibitors) and left at room temperature for 30 minutes. The membrane fraction was pelleted via  
449 centrifugation: 20,800 g for 30 minutes at 4°C. The cytosolic fraction (supernatant) was  
450 transferred to a new tube and placed on ice, and the pellet was washed with 100 µL of TM buffer  
451 and pelleted via centrifugation as above. The supernatant was discarded and the pellet was re-  
452 suspended in 120 µL of 1x SDS dye. SDS loading dye was added to 1x to the cytosolic fraction  
453 and 12 µL of each fraction were used for Western blot analysis.

#### 454 **Culture supernatant protein precipitation**

455 Culture supernatants were concentrated by TCA precipitation as described previously with minor  
456 modifications [66]. A culture was grown at 30°C until OD<sub>600</sub> about 1, and the cells were pelleted  
457 via centrifugation: 7,000 g for 10 minutes at room temperature. The culture supernatant (30 mL)

458 was filtered using a 0.22  $\mu\text{m}$  filter and placed on ice. Proteins were precipitated by addition of 6  
459 mL ice-cold 100% TCA (6.1N), and left on ice for 30 minutes. Precipitated proteins were  
460 pelleted via centrifugation: 18,000 rpm (Sorvall SS-34 rotor) for 30 minutes at 4°C. Pellets were  
461 washed with 1 mL ice-cold acetone and pelleted again via centrifugation: 20,000  $g$  for 15  
462 minutes at 4°C. The supernatant was discarded, and the residual acetone was evaporated by  
463 placing tubes in 100°C heat block for 1-2 minutes. Protein pellets were re-suspended in 120  $\mu\text{L}$   
464 6x SDS-loading dye and 12  $\mu\text{L}$  were used in Western blot analysis.

#### 465 **Proteinase K sensitivity assay**

466 Proteinase K sensitivity assays were performed similar to previous reports [49, 67]. A cell pellet  
467 from 0.5 mL  $\text{OD}_{600} = 1$  equivalent was harvested and washed as in “subcellular fractionation.”  
468 Protoplasts were generated by resuspension in 36  $\mu\text{L}$  1x SMM buffer (0.5 M sucrose, 0.02 M  
469 maleic acid, 0.02 M  $\text{MgCl}_2$ , adjusted to pH 6.5) containing 1 mg/mL lysozyme at room  
470 temperature for 1 hour. Either 9  $\mu\text{L}$  of 1x SMM buffer or 0.5 mg/mL proteinase K (dissolved in  
471 1x SMM buffer) was added (final proteinase K concentration of 100  $\mu\text{g}/\text{mL}$ ) and incubated at  
472 37°C for the time indicated in the figures. Reactions were stopped by the addition of 5  $\mu\text{L}$  50  
473 mM PMSF (final concentration of 5 mM) and 25  $\mu\text{L}$  6x SDS-dye (final concentration of 2x). For  
474 Western blot analysis, 12  $\mu\text{L}$  were used.

#### 475 **Microscopy**

476 Strains were grown on LB agar plates containing 5  $\mu\text{g}/\text{mL}$  chloramphenicol at 30°C overnight.  
477 For GFP-DdcA and DdcA-GFP, LB agar plates were washed with  $S7_{50}$  media containing 1%  
478 arabinose and cultures of  $S7_{50}$  media containing 1% arabinose and 0.05% xylose were inoculated  
479 at an  $\text{OD}_{600} = 0.1$  and incubated at 30°C until an  $\text{OD}_{600}$  of about 0.4. Samples were taken and

480 incubated with 2  $\mu\text{g}/\text{mL}$  FM4-64 for 5 minutes and transferred to pads of 1x Spizizen salts and  
481 1% agarose. Images were captured with an Olympus BX61 microscope using 250 ms and 1000  
482 ms exposure times for FM4-64 (membranes) and GFP, respectively. The brightness and contrast  
483 were adjusted for FM4-64 images with adjustments applied to the entire image. Strains with  
484 GFP-YneA were grown on LB agar plates containing 5  $\mu\text{g}/\text{mL}$  chloramphenicol overnight at  
485 30°C. Plates were washed with S7<sub>50</sub> minimal media containing 1% arabinose and cultures started  
486 at an OD<sub>600</sub> = 0.1. Cultures were grown at 30°C until an OD<sub>600</sub> of about 0.3 and xylose was  
487 added to 0.1%. Cultures were grown for 30 minutes at 30°C and imaged as for GFP-DdcA with  
488 exposure times of 300 ms for FM4-64 and 500 ms for GFP.

#### 489 **Author contributions**

490 The study was conceived and designed by P.E.B. and L.A.S. Experiments were performed by  
491 P.E.B. and Z.W.S. Data analysis was performed by P.E.B., Z.W.S., and L.A.S. The manuscript  
492 was written and revised by P.E.B. and L.A.S.

#### 493 **References**

- 494 1. Westfall CS, Levin PA. Bacterial Cell Size: Multifactorial and Multifaceted. Annual  
495 review of microbiology. 2017;71:499-517. Epub 2017/09/10. doi: 10.1146/annurev-micro-  
496 090816-093803. PubMed PMID: 28886685; PubMed Central PMCID: PMC6018054.
- 497 2. Wang JD, Levin PA. Metabolism, cell growth and the bacterial cell cycle. Nature reviews  
498 Microbiology. 2009;7(11):822-7. Epub 2009/10/07. doi: 10.1038/nrmicro2202. PubMed PMID:  
499 19806155; PubMed Central PMCID: PMC6018054.
- 500 3. Donachie WD, Blakely GW. Coupling the initiation of chromosome replication to cell  
501 size in Escherichia coli. Current opinion in microbiology. 2003;6(2):146-50. Epub 2003/05/07.  
502 PubMed PMID: 12732304.
- 503 4. Hill NS, Kadoya R, Chatteraj DK, Levin PA. Cell size and the initiation of DNA  
504 replication in bacteria. PLoS Genet. 2012;8(3):e1002549. Epub 2012/03/08. doi:  
505 10.1371/journal.pgen.1002549. PubMed PMID: 22396664; PubMed Central PMCID:  
506 PMC6018054.
- 507 5. Kreuzer KN. DNA damage responses in prokaryotes: regulating gene expression,  
508 modulating growth patterns, and manipulating replication forks. Cold Spring Harb Perspect Biol.



- 509 2013;5(11):a012674. Epub 2013/10/08. doi: 10.1101/cshperspect.a012674. PubMed PMID:  
510 24097899; PubMed Central PMCID: PMCPMC3809575.
- 511 6. Lenhart JS, Schroeder JW, Walsh BW, Simmons LA. DNA repair and genome  
512 maintenance in *Bacillus subtilis*. *Microbiology and molecular biology reviews* : MMBR.  
513 2012;76(3):530-64. Epub 2012/08/31. doi: 10.1128/mmbr.05020-11. PubMed PMID: 22933559;  
514 PubMed Central PMCID: PMCPMC3429619.
- 515 7. Friedberg EC, Walker GC, Siede W, Wood RD, Schultz RA, Ellenberger T. DNA Repair  
516 and Mutagenesis. 2nd ed. Washington, D.C.: ASM Press; 2006.
- 517 8. Ivancic-Bace I, Vlastic I, Salaj-Smic E, Brcic-Kostic K. Genetic evidence for the  
518 requirement of RecA loading activity in SOS induction after UV irradiation in *Escherichia coli*.  
519 *Journal of bacteriology*. 2006;188(14):5024-32. Epub 2006/07/04. doi: 10.1128/jb.00130-06.  
520 PubMed PMID: 16816175; PubMed Central PMCID: PMCPMC1539949.
- 521 9. Anderson DG, Kowalczykowski SC. The translocating RecBCD enzyme stimulates  
522 recombination by directing RecA protein onto ssDNA in a chi-regulated manner. *Cell*.  
523 1997;90(1):77-86. Epub 1997/07/11. PubMed PMID: 9230304.
- 524 10. Churchill JJ, Anderson DG, Kowalczykowski SC. The RecBC enzyme loads RecA  
525 protein onto ssDNA asymmetrically and independently of chi, resulting in constitutive  
526 recombination activation. *Genes & development*. 1999;13(7):901-11. Epub 1999/04/10. PubMed  
527 PMID: 10197989; PubMed Central PMCID: PMCPMC316600.
- 528 11. Morimatsu K, Kowalczykowski SC. RecFOR proteins load RecA protein onto gapped  
529 DNA to accelerate DNA strand exchange: a universal step of recombinational repair. *Mol Cell*.  
530 2003;11(5):1337-47. Epub 2003/05/29. PubMed PMID: 12769856.
- 531 12. Ivancic-Bace I, Peharec P, Moslavac S, Skrobot N, Salaj-Smic E, Brcic-Kostic K.  
532 RecFOR function is required for DNA repair and recombination in a RecA loading-deficient  
533 recB mutant of *Escherichia coli*. *Genetics*. 2003;163(2):485-94. Epub 2003/03/06. PubMed  
534 PMID: 12618388; PubMed Central PMCID: PMCPMC1462458.
- 535 13. Slilaty SN, Little JW. Lysine-156 and serine-119 are required for LexA repressor  
536 cleavage: a possible mechanism. *Proceedings of the National Academy of Sciences of the United*  
537 *States of America*. 1987;84(12):3987-91. Epub 1987/06/01. PubMed PMID: 3108885; PubMed  
538 Central PMCID: PMCPMC305006.
- 539 14. Little JW, Mount DW, Yanisch-Perron CR. Purified lexA protein is a repressor of the  
540 recA and lexA genes. *Proceedings of the National Academy of Sciences of the United States of*  
541 *America*. 1981;78(7):4199-203. Epub 1981/07/01. PubMed PMID: 7027255; PubMed Central  
542 PMCID: PMCPMC319756.
- 543 15. Lewis LK, Harlow GR, Gregg-Jolly LA, Mount DW. Identification of high affinity  
544 binding sites for LexA which define new DNA damage-inducible genes in *Escherichia coli*. *J*  
545 *Mol Biol*. 1994;241(4):507-23. Epub 1994/08/26. doi: 10.1006/jmbi.1994.1528. PubMed PMID:  
546 8057377.
- 547 16. Little JW, Mount DW. The SOS regulatory system of *Escherichia coli*. *Cell*.  
548 1982;29(1):11-22. Epub 1982/05/01. PubMed PMID: 7049397.
- 549 17. Au N, Kuester-Schoeck E, Mandava V, Bothwell LE, Canny SP, Chachu K, et al.  
550 Genetic composition of the *Bacillus subtilis* SOS system. *Journal of bacteriology*.  
551 2005;187(22):7655-66. doi: 10.1128/jb.187.22.7655-7666.2005. PubMed PMID:  
552 WOS:000233400200013.
- 553 18. Goranov AI, Kuester-Schoeck E, Wang JD, Grossman AD. Characterization of the global  
554 transcriptional responses to different types of DNA damage and disruption of replication in



- 555 *Bacillus subtilis*. *Journal of bacteriology*. 2006;188(15):5595-605. doi: 10.1128/jb.00342-06.  
556 PubMed PMID: WOS:000239366400029.
- 557 19. Huisman O, D'Ari R. An inducible DNA replication-cell division coupling mechanism in  
558 *E. coli*. *Nature*. 1981;290(5809):797-9. Epub 1981/04/30. PubMed PMID: 7012641.
- 559 20. Huisman O, D'Ari R, Gottesman S. Cell-division control in *Escherichia coli*: specific  
560 induction of the SOS function SfiA protein is sufficient to block septation. *Proceedings of the*  
561 *National Academy of Sciences of the United States of America*. 1984;81(14):4490-4. Epub  
562 1984/07/01. PubMed PMID: 6087326; PubMed Central PMCID: PMCPMC345616.
- 563 21. Kawai Y, Moriya S, Ogasawara N. Identification of a protein, YneA, responsible for cell  
564 division suppression during the SOS response in *Bacillus subtilis*. *Molecular microbiology*.  
565 2003;47(4):1113-22. Epub 2003/02/13. PubMed PMID: 12581363.
- 566 22. Mo AH, Burkholder WF. YneA, an SOS-induced inhibitor of cell division in *Bacillus*  
567 *subtilis*, is regulated posttranslationally and requires the transmembrane region for activity.  
568 *Journal of bacteriology*. 2010;192(12):3159-73. Epub 2010/04/20. doi: 10.1128/jb.00027-10.  
569 PubMed PMID: 20400548; PubMed Central PMCID: PMCPMC2901685.
- 570 23. Erill I, Campoy S, Barbe J. Aeons of distress: an evolutionary perspective on the bacterial  
571 SOS response. *FEMS microbiology reviews*. 2007;31(6):637-56. Epub 2007/09/22. doi:  
572 10.1111/j.1574-6976.2007.00082.x. PubMed PMID: 17883408.
- 573 24. Bi E, Lutkenhaus J. Cell division inhibitors SulaA and MinCD prevent formation of the  
574 FtsZ ring. *Journal of bacteriology*. 1993;175(4):1118-25. Epub 1993/02/01. PubMed PMID:  
575 8432706; PubMed Central PMCID: PMCPMC193028.
- 576 25. Huang J, Cao C, Lutkenhaus J. Interaction between FtsZ and inhibitors of cell division.  
577 *Journal of bacteriology*. 1996;178(17):5080-5. Epub 1996/09/01. PubMed PMID: 8752322;  
578 PubMed Central PMCID: PMCPMC178301.
- 579 26. Mukherjee A, Cao C, Lutkenhaus J. Inhibition of FtsZ polymerization by SulaA, an  
580 inhibitor of septation in *Escherichia coli*. *Proceedings of the National Academy of Sciences of*  
581 *the United States of America*. 1998;95(6):2885-90. Epub 1998/04/18. PubMed PMID: 9501185;  
582 PubMed Central PMCID: PMCPMC19664.
- 583 27. Trusca D, Scott S, Thompson C, Bramhill D. Bacterial SOS checkpoint protein SulaA  
584 inhibits polymerization of purified FtsZ cell division protein. *Journal of bacteriology*.  
585 1998;180(15):3946-53. Epub 1998/07/31. PubMed PMID: 9683493; PubMed Central PMCID:  
586 PMCPMC107380.
- 587 28. Chauhan A, Lofton H, Maloney E, Moore J, Fol M, Madiraju MV, et al. Interference of  
588 *Mycobacterium tuberculosis* cell division by Rv2719c, a cell wall hydrolase. *Molecular*  
589 *microbiology*. 2006;62(1):132-47. Epub 2006/09/01. doi: 10.1111/j.1365-2958.2006.05333.x.  
590 PubMed PMID: 16942606.
- 591 29. Ogino H, Teramoto H, Inui M, Yukawa H. DivS, a novel SOS-inducible cell-division  
592 suppressor in *Corynebacterium glutamicum*. *Molecular microbiology*. 2008;67(3):597-608. Epub  
593 2007/12/19. doi: 10.1111/j.1365-2958.2007.06069.x. PubMed PMID: 18086211.
- 594 30. Modell JW, Hopkins AC, Laub MT. A DNA damage checkpoint in *Caulobacter*  
595 *crescentus* inhibits cell division through a direct interaction with FtsW. *Genes & development*.  
596 2011;25(12):1328-43. Epub 2011/06/21. doi: 10.1101/gad.2038911. PubMed PMID: 21685367;  
597 PubMed Central PMCID: PMCPMC3127433.
- 598 31. Modell JW, Kambara TK, Perchuk BS, Laub MT. A DNA damage-induced, SOS-  
599 independent checkpoint regulates cell division in *Caulobacter crescentus*. *PLoS biology*.

- 600 2014;12(10):e1001977. Epub 2014/10/29. doi: 10.1371/journal.pbio.1001977. PubMed PMID:  
601 25350732; PubMed Central PMCID: PMC4211646.
- 602 32. Canceill D, Dervyn E, Huisman O. Proteolysis and modulation of the activity of the cell  
603 division inhibitor Sula in *Escherichia coli* lon mutants. *Journal of bacteriology*.  
604 1990;172(12):7297-300. Epub 1990/12/01. PubMed PMID: 2254289; PubMed Central PMCID:  
605 PMC210862.
- 606 33. Mizusawa S, Gottesman S. Protein degradation in *Escherichia coli*: the lon gene controls  
607 the stability of sulA protein. *Proceedings of the National Academy of Sciences of the United*  
608 *States of America*. 1983;80(2):358-62. Epub 1983/01/01. PubMed PMID: 6300834; PubMed  
609 Central PMCID: PMC393376.
- 610 34. Sonezaki S, Ishii Y, Okita K, Sugino T, Kondo A, Kato Y. Overproduction and  
611 purification of Sula fusion protein in *Escherichia coli* and its degradation by Lon protease in  
612 vitro. *Applied microbiology and biotechnology*. 1995;43(2):304-9. Epub 1995/05/01. PubMed  
613 PMID: 7612249.
- 614 35. Wu WF, Zhou Y, Gottesman S. Redundant in vivo proteolytic activities of *Escherichia*  
615 *coli* Lon and the ClpYQ (HslUV) protease. *Journal of bacteriology*. 1999;181(12):3681-7. Epub  
616 1999/06/15. PubMed PMID: 10368141; PubMed Central PMCID: PMC93844.
- 617 36. Seong IS, Oh JY, Yoo SJ, Seol JH, Chung CH. ATP-dependent degradation of Sula, a  
618 cell division inhibitor, by the HslVU protease in *Escherichia coli*. *FEBS letters*.  
619 1999;456(1):211-4. Epub 1999/08/19. PubMed PMID: 10452560.
- 620 37. Kanemori M, Yanagi H, Yura T. The ATP-dependent HslVU/ClpQY protease  
621 participates in turnover of cell division inhibitor Sula in *Escherichia coli*. *Journal of*  
622 *bacteriology*. 1999;181(12):3674-80. Epub 1999/06/15. PubMed PMID: 10368140; PubMed  
623 Central PMCID: PMC93843.
- 624 38. Burby PE, Simmons ZW, Schroeder JW, Simmons LA. Discovery of a dual protease  
625 mechanism that promotes DNA damage checkpoint recovery. *PLoS Genet*.  
626 2018;14(7):e1007512. Epub 2018/07/07. doi: 10.1371/journal.pgen.1007512. PubMed PMID:  
627 29979679.
- 628 39. Goranov AI, Katz L, Breier AM, Burge CB, Grossman AD. A transcriptional response to  
629 replication status mediated by the conserved bacterial replication protein DnaA. *Proceedings of*  
630 *the National Academy of Sciences of the United States of America*. 2005;102(36):12932-7. Epub  
631 2005/08/27. doi: 10.1073/pnas.0506174102. PubMed PMID: 16120674; PubMed Central  
632 PMCID: PMC1200305.
- 633 40. Cerveny L, Straskova A, Dankova V, Hartlova A, Ceckova M, Staud F, et al.  
634 Tetratricopeptide repeat motifs in the world of bacterial pathogens: role in virulence  
635 mechanisms. *Infection and immunity*. 2013;81(3):629-35. Epub 2012/12/25. doi:  
636 10.1128/iai.01035-12. PubMed PMID: 23264049; PubMed Central PMCID: PMC3584863.
- 637 41. Noll DM, Mason TM, Miller PS. Formation and repair of interstrand cross-links in DNA.  
638 *Chemical reviews*. 2006;106(2):277-301. Epub 2006/02/09. doi: 10.1021/cr040478b. PubMed  
639 PMID: 16464006; PubMed Central PMCID: PMC2505341.
- 640 42. Iyer VN, Szybalski W. A molecular mechanism of mitomycin action: Linking of  
641 complementary DNA strands. *Proceedings of the National Academy of Sciences of the United*  
642 *States of America*. 1963;50:355-62. Epub 1963/08/01. PubMed PMID: 14060656; PubMed  
643 Central PMCID: PMC221180.

- 644 43. Reiter H, Milewskiy M, Kelley P. Mode of action of phleomycin on *Bacillus subtilis*.  
645 *Journal of bacteriology*. 1972;111(2):586-92. Epub 1972/08/01. PubMed PMID: 4626504;  
646 PubMed Central PMCID: PMCPMC251321.
- 647 44. Kross J, Henner WD, Hecht SM, Haseltine WA. Specificity of deoxyribonucleic acid  
648 cleavage by bleomycin, phleomycin, and tallysomylin. *Biochemistry*. 1982;21(18):4310-8. Epub  
649 1982/08/31. PubMed PMID: 6181807.
- 650 45. Sancar A. DNA excision repair. *Annual review of biochemistry*. 1996;65:43-81. Epub  
651 1996/01/01. doi: 10.1146/annurev.bi.65.070196.000355. PubMed PMID: 8811174.
- 652 46. Krogh A, Larsson B, von Heijne G, Sonnhammer EL. Predicting transmembrane protein  
653 topology with a hidden Markov model: application to complete genomes. *J Mol Biol*.  
654 2001;305(3):567-80. Epub 2001/01/12. doi: 10.1006/jmbi.2000.4315. PubMed PMID:  
655 11152613.
- 656 47. Tjalsma H, Bolhuis A, Jongbloed JD, Bron S, van Dijl JM. Signal peptide-dependent  
657 protein transport in *Bacillus subtilis*: a genome-based survey of the secretome. *Microbiology and  
658 molecular biology reviews* : MMBR. 2000;64(3):515-47. Epub 2000/09/07. PubMed PMID:  
659 10974125; PubMed Central PMCID: PMCPMC99003.
- 660 48. Wu LJ, Errington J. Septal localization of the SpoIIIIE chromosome partitioning protein in  
661 *Bacillus subtilis*. *The EMBO journal*. 1997;16(8):2161-9. Epub 1997/04/15. doi:  
662 10.1093/emboj/16.8.2161. PubMed PMID: 9155041; PubMed Central PMCID:  
663 PMCPMC1169818.
- 664 49. Wilson MJ, Carlson PE, Janes BK, Hanna PC. Membrane topology of the *Bacillus*  
665 *anthracis* GerH germinant receptor proteins. *Journal of bacteriology*. 2012;194(6):1369-77. Epub  
666 2011/12/20. doi: 10.1128/jb.06538-11. PubMed PMID: 22178966; PubMed Central PMCID:  
667 PMCPMC3294866.
- 668 50. Buttner K, Bernhardt J, Scharf C, Schmid R, Mader U, Eymann C, et al. A  
669 comprehensive two-dimensional map of cytosolic proteins of *Bacillus subtilis*. *Electrophoresis*.  
670 2001;22(14):2908-35. Epub 2001/09/22. doi: 10.1002/1522-2683(200108)22:14<2908::aid-  
671 elps2908>3.0.co;2-m. PubMed PMID: 11565787.
- 672 51. Eymann C, Dreisbach A, Albrecht D, Bernhardt J, Becher D, Gentner S, et al. A  
673 comprehensive proteome map of growing *Bacillus subtilis* cells. *Proteomics*. 2004;4(10):2849-  
674 76. Epub 2004/09/21. doi: 10.1002/pmic.200400907. PubMed PMID: 15378759.
- 675 52. Hirose I, Sano K, Shioda I, Kumano M, Nakamura K, Yamane K. Proteome analysis of  
676 *Bacillus subtilis* extracellular proteins: a two-dimensional protein electrophoretic study.  
677 *Microbiology (Reading, England)*. 2000;146 ( Pt 1):65-75. Epub 2000/02/05. doi:  
678 10.1099/00221287-146-1-65. PubMed PMID: 10658653.
- 679 53. TMBASE - A database of membrane spanning protein segments [Internet]. 1993.
- 680 54. Bendtsen JD, Kiemer L, Fausboll A, Brunak S. Non-classical protein secretion in  
681 bacteria. *BMC microbiology*. 2005;5:58. Epub 2005/10/11. doi: 10.1186/1471-2180-5-58.  
682 PubMed PMID: 16212653; PubMed Central PMCID: PMCPMC1266369.
- 683 55. Yu NY, Wagner JR, Laird MR, Melli G, Rey S, Lo R, et al. PSORTb 3.0: improved  
684 protein subcellular localization prediction with refined localization subcategories and predictive  
685 capabilities for all prokaryotes. *Bioinformatics (Oxford, England)*. 2010;26(13):1608-15. Epub  
686 2010/05/18. doi: 10.1093/bioinformatics/btq249. PubMed PMID: 20472543; PubMed Central  
687 PMCID: PMCPMC2887053.

- 688 56. Bojer MS, Wacnik K, Kjelgaard P, Gallay C, Bottomley AL, Cohn MT, et al. SosA  
689 inhibits cell division in *Staphylococcus aureus* in response to DNA damage. *bioRxiv*. 2018. doi:  
690 10.1101/364299.
- 691 57. Scheffers DJ, Errington J. PBP1 is a component of the *Bacillus subtilis* cell division  
692 machinery. *Journal of bacteriology*. 2004;186(15):5153-6. Epub 2004/07/21. doi:  
693 10.1128/jb.186.15.5153-5156.2004. PubMed PMID: 15262952; PubMed Central PMCID:  
694 PMCPMC451649.
- 695 58. Claessen D, Emmins R, Hamoen LW, Daniel RA, Errington J, Edwards DH. Control of  
696 the cell elongation-division cycle by shuttling of PBP1 protein in *Bacillus subtilis*. *Molecular*  
697 *microbiology*. 2008;68(4):1029-46. Epub 2008/03/28. doi: 10.1111/j.1365-2958.2008.06210.x.  
698 PubMed PMID: 18363795.
- 699 59. Buist G, Steen A, Kok J, Kuipers OP. LysM, a widely distributed protein motif for  
700 binding to (peptido)glycans. *Molecular microbiology*. 2008;68(4):838-47. Epub 2008/04/24. doi:  
701 10.1111/j.1365-2958.2008.06211.x. PubMed PMID: 18430080.
- 702 60. Daniel RA, Errington J. Control of cell morphogenesis in bacteria: two distinct ways to  
703 make a rod-shaped cell. *Cell*. 2003;113(6):767-76. Epub 2003/06/18. PubMed PMID: 12809607.
- 704 61. Tiyanont K, Doan T, Lazarus MB, Fang X, Rudner DZ, Walker S. Imaging  
705 peptidoglycan biosynthesis in *Bacillus subtilis* with fluorescent antibiotics. *Proceedings of the*  
706 *National Academy of Sciences of the United States of America*. 2006;103(29):11033-8. Epub  
707 2006/07/13. doi: 10.1073/pnas.0600829103. PubMed PMID: 16832063; PubMed Central  
708 PMCID: PMCPMC1544169.
- 709 62. Smith DF. Tetratricopeptide repeat cochaperones in steroid receptor complexes. *Cell*  
710 *stress & chaperones*. 2004;9(2):109-21. Epub 2004/10/23. PubMed PMID: 15497498; PubMed  
711 Central PMCID: PMCPMC1065291.
- 712 63. Youngman P, Perkins JB, Losick R. Construction of a cloning site near one end of  
713 TN917 into which foreign DNA may be inserted without affecting transposition in *Bacillus*  
714 *subtilis* or expression of the transposon-borne ERM gene. *Plasmid*. 1984;12(1):1-9. doi:  
715 10.1016/0147-619x(84)90061-1. PubMed PMID: WOS:A1984TH41600001.
- 716 64. Burby PE, Simmons LA. MutS2 Promotes Homologous Recombination in *Bacillus*  
717 *subtilis*. *Journal of bacteriology*. 2017;199(2). Epub 2016/11/02. doi: 10.1128/jb.00682-16.  
718 PubMed PMID: 27799325; PubMed Central PMCID: PMCPMC5198493.
- 719 65. Gibson DG. Enzymatic assembly of overlapping DNA fragments. In: Voigt C, editor.  
720 *Synthetic Biology, Pt B: Computer Aided Design and DNA Assembly. Methods in Enzymology*.  
721 498. San Diego: Elsevier Academic Press Inc; 2011. p. 349-61.
- 722 66. Link AJ, LaBaer J. Trichloroacetic acid (TCA) precipitation of proteins. *Cold Spring*  
723 *Harbor protocols*. 2011;2011(8):993-4. Epub 2011/08/03. doi: 10.1101/pdb.prot5651. PubMed  
724 PMID: 21807853.
- 725 67. Navarre WW, Schneewind O. Proteolytic cleavage and cell wall anchoring at the LPXTG  
726 motif of surface proteins in gram-positive bacteria. *Molecular microbiology*. 1994;14(1):115-21.  
727 Epub 1994/10/01. PubMed PMID: 7830549.

728

729 **Tables**

730 **Table 1 Over-expression of GFP-YneA results in a significant increase in cells greater than**  
 731 **5  $\mu\text{m}$  in length in cells lacking *ddcP*, *ctpA*, and *ddcA*.** Data are from expression of GFP-YneA  
 732 using 0.1% xylose for 30 minutes. The mean cell length  $\pm$  the standard deviation is listed. The  
 733 percent of cells greater than 5  $\mu\text{m}$  (number/total cells scored), with the p-value from a two-tailed  
 734 z-test are listed.

| Strain     | Genotype                                                                                                      | No Xylose                    | 0.1% Xylose                 |                          |          |
|------------|---------------------------------------------------------------------------------------------------------------|------------------------------|-----------------------------|--------------------------|----------|
|            |                                                                                                               | Cell length (mean $\pm$ sd)  | Cell length (mean $\pm$ sd) | % $\geq$ 5 $\mu\text{m}$ | p-value  |
| PEB87<br>6 | <i>amyE::P<sub>xyI</sub>-gfp-yneA</i>                                                                         | 1.98 $\pm$ 0.51<br>(n = 685) | 2.91 $\pm$ 0.75             | 0.84%<br>(6/717)         | N/A      |
| PEB88<br>2 | $\Delta$ <i>ddcA</i> , <i>amyE::P<sub>xyI</sub>-gfp-yneA</i>                                                  | 2.48 $\pm$ 0.73<br>(n = 672) | 2.86 $\pm$ 0.85             | 1.16%<br>(7/601)         | 0.55     |
| PEB88<br>8 | $\Delta$ <i>ddcP</i> , $\Delta$ <i>ctpA</i> ,<br><i>amyE::P<sub>xyI</sub>-gfp-yneA</i>                        | 2.18 $\pm$ 0.60<br>(n = 690) | 2.49 $\pm$ 0.70             | 0.68%<br>(5/734)         | 0.73     |
| PEB89<br>4 | $\Delta$ <i>ddcP</i> , $\Delta$ <i>ctpA</i> , $\Delta$ <i>ddcA</i> ,<br><i>amyE::P<sub>xyI</sub>-gfp-yneA</i> | 2.39 $\pm$ 1.10<br>(n = 695) | 4.09 $\pm$ 2.09             | 22.4%<br>(159/711)       | >0.00001 |

735

736 **Table 2 Strains used in this study**

| Strain | Genotype                                                                                        | Reference  |
|--------|-------------------------------------------------------------------------------------------------|------------|
| PY79   | PY79                                                                                            | [63]       |
| PEB309 | $\Delta$ <i>uvrAB</i>                                                                           | This study |
| PEB324 | $\Delta$ <i>ddcP</i> ( <i>ylbL</i> )                                                            | [38]       |
| PEB355 | $\Delta$ <i>ctpA</i>                                                                            | [38]       |
| PEB357 | $\Delta$ <i>ddcA</i> ( <i>ysoA</i> )                                                            | [38]       |
| PEB433 | $\Delta$ <i>yneA::erm</i>                                                                       | [38]       |
| PEB439 | $\Delta$ <i>yneA::loxP</i>                                                                      | [38]       |
| PEB495 | $\Delta$ <i>ddcA</i> , $\Delta$ <i>yneA::erm</i>                                                | This study |
| PEB497 | $\Delta$ <i>uvrAB</i> , $\Delta$ <i>ddcA</i>                                                    | This study |
| PEB499 | $\Delta$ <i>ddcP</i> , $\Delta$ <i>ddcA</i>                                                     | This study |
| PEB503 | $\Delta$ <i>ddcA</i> , <i>amyE::P<sub>xyI</sub>-ddcA</i>                                        | This study |
| PEB555 | $\Delta$ <i>ddcP</i> , $\Delta$ <i>ctpA</i>                                                     | [38]       |
| PEB557 | $\Delta$ <i>ddcP</i> , $\Delta$ <i>ctpA</i> , <i>amyE::P<sub>xyI</sub>-ddcP</i>                 | [38]       |
| PEB561 | $\Delta$ <i>ddcP</i> , $\Delta$ <i>ctpA</i> , $\Delta$ <i>yneA::loxP</i>                        | [38]       |
| PEB579 | $\Delta$ <i>ctpA</i> , $\Delta$ <i>ddcA</i>                                                     | This study |
| PEB587 | $\Delta$ <i>ddcA</i> , $\Delta$ <i>yneA::loxP</i>                                               | This study |
| PEB619 | $\Delta$ <i>ddcP</i> , $\Delta$ <i>ctpA</i> , <i>amyE::P<sub>xyI</sub>-ctpA</i>                 | [38]       |
| PEB639 | $\Delta$ <i>ddcP</i> , $\Delta$ <i>ctpA</i> , $\Delta$ <i>ddcA</i>                              | This study |
| PEB643 | $\Delta$ <i>ddcP</i> , $\Delta$ <i>ctpA</i> , $\Delta$ <i>ddcA</i> , $\Delta$ <i>yneA::loxP</i> | This study |
| PEB719 | $\Delta$ <i>ddcP</i> , <i>amyE::P<sub>xyI</sub>-ddcP</i> $\Delta$ <i>TM</i>                     | This study |



|        |                                                                 |            |
|--------|-----------------------------------------------------------------|------------|
| PEB772 | $\Delta ctpA, amyE::P_{xyl-ctpA}\Delta TM$                      | This study |
| PEB774 | $ddcP\Delta PDZ$                                                | This study |
| PEB776 | $ctpA\Delta PDZ$                                                | This study |
| PEB836 | $\Delta ddcA, amyE::P_{xyl-ddcP}$                               | This study |
| PEB837 | $\Delta ddcA, amyE::P_{xyl-ctpA}$                               | This study |
| PEB838 | $\Delta ddcP, \Delta ctpA, amyE::P_{xyl-ddcA}$                  | This study |
| PEB839 | $\Delta ddcP, \Delta ctpA, \Delta ddcA, amyE::P_{xyl-ddcP}$     | This study |
| PEB840 | $\Delta ddcP, \Delta ctpA, \Delta ddcA, amyE::P_{xyl-ddcA}$     | This study |
| PEB841 | $\Delta ddcP, \Delta ctpA, \Delta ddcA, amyE::P_{xyl-ctpA}$     | This study |
| PEB846 | $amyE::P_{xyl-yneA}$                                            | This study |
| PEB848 | $\Delta ddcA, amyE::P_{xyl-yneA}$                               | This study |
| PEB850 | $\Delta ddcP, \Delta ctpA, amyE::P_{xyl-yneA}$                  | This study |
| PEB852 | $\Delta ddcP, \Delta ctpA, \Delta ddcA, amyE::P_{xyl-yneA}$     | This study |
| PEB854 | $\Delta ddcA, amyE::P_{xyl-gfp-ddcA}$                           | This study |
| PEB856 | $\Delta ddcA, amyE::P_{xyl-ddcA-gfp}$                           | This study |
| PEB876 | $amyE::P_{xyl-gfp-yneA}$                                        | This study |
| PEB882 | $\Delta ddcA, amyE::P_{xyl-gfp-yneA}$                           | This study |
| PEB888 | $\Delta ddcP, \Delta ctpA, amyE::P_{xyl-gfp-yneA}$              | This study |
| PEB894 | $\Delta ddcP, \Delta ctpA, \Delta ddcA, amyE::P_{xyl-gfp-yneA}$ | This study |

737

## 738 **Figure Legends**

739 **Figure 1. Deletion of *ddcA* (*ysoA*) results in sensitivity to DNA damage. (A)** A schematic of  
 740 the DdcA protein. DdcA is predicted to have 334 amino acids and 3 tetratrichoepptide repeats at  
 741 its N-terminus. **(B)** A spot titer assay in which exponentially growing cultures of *B. subtilis*  
 742 strains WT (PY79),  $\Delta ddcA$  (PEB357), and  $\Delta ddcA, amyE::P_{xyl-ddcA}$  (PEB503) were spotted on  
 743 the indicated media and incubated at 30°C overnight.

744 **Figure 2. DdcA functions independent of the checkpoint recovery proteases. (A)** Spot titer  
 745 assay using *B. subtilis* strains WT (PY79),  $\Delta ddcA$  (PEB357),  $\Delta ddcP$  (PEB324),  $\Delta ddcA \Delta ddcP$   
 746 (PEB499),  $\Delta ctpA$  (PEB355), and  $\Delta ddcA \Delta ctpA$  (PEB579) spotted on the indicated media. **(B)**  
 747 Spot titer assay using *B. subtilis* strains WT (PY79),  $\Delta ddcA$  (PEB357),  $\Delta ddcP \Delta ctpA$  (PEB555),  
 748  $\Delta ddcA \Delta ddcP \Delta ctpA$  (PEB639),  $\Delta yneA::loxP$  (PEB439),  $\Delta ddcA \Delta yneA::loxP$  (PEB587),  $\Delta ddcP$

749  $\Delta ctpA \Delta yneA::loxP$  (PEB561), and  $\Delta ddcA \Delta ddcP \Delta ctpA \Delta yneA::loxP$  (PEB643) spotted on the  
750 indicated media.

751 **Figure 3. DdcA cannot complement loss of checkpoint recovery proteases. (A)** Spot titer  
752 assay using *B. subtilis* strains WT (PY79),  $\Delta ddcA$  (PEB357),  $\Delta ddcA amyE::P_{xyl}-ddcP$  (PEB836),  
753 and  $\Delta ddcA amyE::P_{xyl}-ctpA$  (PEB837) spotted on the indicated media. **(B)** Spot titer assay using  
754 *B. subtilis* strains WT (PY79),  $\Delta ddcP \Delta ctpA$  (PEB555),  $\Delta ddcP$ ,  $\Delta ctpA$ ,  $amyE::P_{xyl}-ddcA$   
755 (PEB838),  $\Delta ddcP$ ,  $\Delta ctpA$ ,  $amyE::P_{xyl}-ddcP$  (PEB557),  $\Delta ddcA \Delta ddcP \Delta ctpA$  (PEB639),  $\Delta ddcP$ ,  
756  $\Delta ctpA$ ,  $\Delta ddcA$ ,  $amyE::P_{xyl}-ddcA$  (PEB840),  $\Delta ddcP$ ,  $\Delta ctpA$ ,  $\Delta ddcA$ ,  $amyE::P_{xyl}-ddcP$  (PEB839),  
757 and  $\Delta ddcP$ ,  $\Delta ctpA$ ,  $\Delta ddcA$ ,  $amyE::P_{xyl}-ctpA$  (PEB841) spotted on the indicated media. **(C)** Spot  
758 titer assay using *B. subtilis* strains WT (PY79),  $\Delta ddcP \Delta ctpA$  (PEB555),  $\Delta ddcP$ ,  $\Delta ctpA$ ,  
759  $amyE::P_{xyl}-ddcA$  (PEB838),  $\Delta ddcA \Delta ddcP \Delta ctpA$  (PEB639),  $\Delta ddcP$ ,  $\Delta ctpA$ , and  $\Delta ddcA$ ,  
760  $amyE::P_{xyl}-ddcA$  (PEB840) spotted on the indicated media.

761 **Figure 4. Deletion of *ddcA* results in sensitivity to *yneA* overexpression independent of**  
762 **YneA stability. (A)** Spot titer testing the effect of *yneA* overexpression. *B. subtilis* strains WT  
763 (PY79),  $amyE::P_{xyl}-yneA$  (PEB846),  $\Delta ddcA amyE::P_{xyl}-yneA$  (PEB848),  $\Delta ddcP$ ,  $\Delta ctpA$ ,  
764  $amyE::P_{xyl}-yneA$  (PEB850), and  $\Delta ddcA \Delta ddcP \Delta ctpA$ ,  $amyE::P_{xyl}-yneA$  (PEB852) were spotted  
765 on LB agar media containing increasing concentrations of xylose to induce *yneA* expression. **(B)**  
766 A Western blot using antisera against YneA (Upper panels), or DnaN lower panel using *B.*  
767 *subtilis* strains WT (PY79),  $amyE::P_{xyl}-yneA$  (PEB846),  $\Delta ddcA amyE::P_{xyl}-yneA$  (PEB848),  
768  $\Delta ddcP$ ,  $\Delta ctpA$ ,  $amyE::P_{xyl}-yneA$  (PEB850), and  $\Delta ddcA \Delta ddcP \Delta ctpA$ ,  $amyE::P_{xyl}-yneA$  (PEB852)  
769 after growing in the presence of 0.1% xylose for two hours. The panel on the left shows an  
770 increased exposure to see the faint bands of WT and  $\Delta ddcA$ . **(C)** A Western blot using antisera

771 against YneA (upper panel) or DnaN (lower panel). Cultures of  $\Delta ddcP$ ,  $\Delta ctpA$ ,  $amyE::P_{xyl-yneA}$   
772 (PEB850) and  $\Delta ddcA \Delta ddcP \Delta ctpA$ ,  $amyE::P_{xyl-yneA}$  (PEB852) were grown as in panel B,  
773 except at 0 hours erythromycin was added and samples were harvest every hour for three hours.

774 **Figure 5. DdcP and CtpA are membrane anchored with extracellular protease domains (A)**

775 Subcellular fractionation followed by Western blot analysis of WT (PY79) lysates using DdcP  
776 and CtpA antiserum (M, molecular weight standard, WCL, whole cell lysates; Media,  
777 precipitated media proteins; Cyt, cytosolic fraction; Mem, membrane fraction). **(B)** Competing  
778 models for membrane topology of DdcP and CtpA tested with proteinase K sensitivity assay. **(C)**  
779 Proteinase K sensitivity assay followed by Western blot detection of DdcP, CtpA, and DnaN  
780 with antiserum. Samples were treated with lysozyme to generate protoplasts and incubated with  
781 proteinase K for the indicated time (lanes 1-6), or the samples were incubated with lysozyme and  
782 Triton X-100 to disrupt the plasma membrane and incubated with proteinase K for the indicated  
783 time (lanes 7-9). **(D)** Schematics depicting the DdcP $\Delta$ TM (left) and CtpA $\Delta$ TM (right) in which  
784 the transmembrane domain was deleted. **(E)** Proteinase K sensitivity assay followed by Western  
785 blot analysis of strains expressing DdcP $\Delta$ TM (left, PEB719) or CtpA $\Delta$ TM (right, PEB772)  
786 performed as in panel C using a 2 hour incubation with proteinase K.

787 **Figure 6. GFP-DdcA is an intracellular protein and is present in the cytosolic and**

788 **membrane fractions. (A)** Spot titer assay using *B. subtilis* strains WT (PY79),  $\Delta ddcA$   
789 (PEB357),  $\Delta ddcA amyE::P_{xyl-gfp-ddcA}$  (PEB854), and  $\Delta ddcA amyE::P_{xyl-ddcA-gfp}$  (PEB856)  
790 spotted on the indicated media. **(B)** Western blot of cell extracts from *B. subtilis* strains WT  
791 (PY79),  $\Delta ddcA amyE::P_{xyl-gfp-ddcA}$  (PEB854), and  $\Delta ddcA amyE::P_{xyl-ddcA-gfp}$  (PEB856) using  
792 antiserum against GFP. The arrowhead highlights the slightly increased mobility of DdcA-GFP,  
793 and the asterisk denotes a cross-reacting species detected by the GFP antiserum. The smaller



794 arrow indicates the expected migration of free GFP. **(C)** Micrographs from WT (PY79) and  
795  $\Delta ddcA$   $amyE::P_{xyI}-gfp-ddcA$  (PEB854) cultures grown in S7<sub>50</sub> minimal media containing 1%  
796 arabinose with (far left and right panels) or without (middle panels) 0.05% xylose. Images in red  
797 are the membrane stain FM4-64, green are GFP fluorescence and the bottom images are a merge  
798 of FM4-64 and GFP fluorescence. The white lines through cells in the images are a  
799 representation of the line scans of fluorescence intensity generated in ImageJ and plotted below  
800 the micrographs. Scale bar is 5  $\mu$ m. **(D)** Western blot of whole cell lysate (WCL), cytosolic  
801 fraction (Cyt), and membrane fraction (Mem) from  $\Delta ddcA$   $amyE::P_{xyI}-gfp-ddcA$  (PEB854) cell  
802 extracts using antisera against GFP (upper panel) or DdcP (lower panel). The asterisk denotes a  
803 cross-reacting species detected by the GFP antiserum.

804 **Figure 7. DdcA inhibits YneA activity** **(A)** *B. subtilis* strains  $amyE::P_{xyI}-yneA$  (PEB846),  
805  $\Delta ddcA$   $amyE::P_{xyI}-yneA$  (PEB848),  $\Delta ddcP$ ,  $\Delta ctpA$ ,  $amyE::P_{xyI}-yneA$  (PEB850), and  $\Delta ddcA$   
806  $\Delta ddcP$   $\Delta ctpA$ ,  $amyE::P_{xyI}-yneA$  (PEB852),  $amyE::P_{xyI}-gfp-yneA$  (PEB876),  $\Delta ddcA$   $amyE::P_{xyI}-$   
807  $gfp-yneA$  (PEB882),  $\Delta ddcP$ ,  $\Delta ctpA$ ,  $amyE::P_{xyI}-gfp-yneA$  (PEB888), and  $\Delta ddcA$   $\Delta ddcP$   $\Delta ctpA$ ,  
808  $amyE::P_{xyI}-gfp-yneA$  (PEB894) were struck onto LB or LB + 0.1% xylose and incubated at 30°C  
809 overnight. **(B)** Micrographs from the indicated strains from Panel A, grown in minimal media  
810 and treated with 0.1% xylose for 30 minutes. Green images are GFP fluorescence and red images  
811 are FM4-64 membrane stain. The percentage of septal localization is shown for PEB876 (n=591)  
812 and PEB882 (n=542). The p-value of a two-tailed z-test was 0.516. **(C)** Cell length distributions  
813 of strains grown with (right) or without (left) 0.1% xylose. The number of cells measured (n) for  
814 each condition is indicated.

815 **Figure 8. DdcA inhibits enforcement of the DNA damage checkpoint.** A working model for  
816 how DdcA inhibits the activity of YneA. DdcA prevents access to the target of YneA, however,

817 when the SOS response has been activated for a prolonged period of time, YneA is able to  
818 overcome DdcA dependent inhibition to prevent cell division. Following DNA repair and  
819 completion of DNA replication the SOS response is turned off and the checkpoint recovery  
820 proteases degrade YneA allowing cell division to resume.

## 821 Supplemental Figure Legends

822 **Figure S1 DNA damage sensitivity of *ddcA* deletion is dependent on DNA damage**  
823 **checkpoint protein YneA and independent of nucleotide excision repair.** A spot titer assay  
824 using *B. subtilis* strains WT (PY79),  $\Delta ddcA$  (PEB357),  $\Delta uvrAB$  (PEB309),  $\Delta yneA::erm$   
825 (PEB433),  $\Delta ddcA \Delta yneA::erm$  (PEB495), and  $\Delta ddcA \Delta uvrAB$  (PEB497) spotted on the indicated  
826 media.

827 **Figure S2 Deletion of *ddcA* can be complemented by ectopic expression using high levels of**  
828 **xylose.** A Spot titer assay using WT (PY79),  $\Delta ddcA$  (PEB357), and  $\Delta ddcA amyE::P_{xyI}-ddcA$   
829 (PEB503) spotted on the indicated media and incubated at 30°C overnight.

830 **Figure S3 Deletion of *ddcA* does not increase YneA protein levels following MMC**  
831 **treatment and recovery.** Western blotting using antisera against YneA (top panel) or DnaN  
832 (bottom panel) using whole cell extracts from WT (PY79),  $\Delta ddcA$  (PEB357),  $\Delta ddcP \Delta ctpA$   
833 (PEB555),  $\Delta ddcA \Delta ddcP \Delta ctpA$  (PEB639) after a two hour treatment with 100 ng/mL MMC  
834 (lanes labeled “MMC”) or after recovering for two hours from MMC treatment (lanes labeled  
835 “2h Rec”).

836 **Figure S4 DdcA-GFP is intracellular and found in the cytosolic and membrane fractions.**  
837 **(A)** Micrographs from WT (PY79) and  $\Delta ddcA amyE::P_{xyI}-ddcA-gfp$  (PEB856) cultures grown in  
838 S7<sub>50</sub> minimal media containing 1% arabinose and 0.05% xylose. Images in red are the membrane

839 stain FM4-64, green are GFP fluorescence and the bottom images are a merge of FM4-64 and  
840 GFP fluorescence. The white lines through cells in the images are a representation of the line  
841 scans of fluorescence intensity generated in ImageJ and plotted below the micrographs. Scale bar  
842 is 5  $\mu\text{m}$ . **(B)** Western blot of the whole cell lysate (WCL), cytosolic fraction (Cyt), and  
843 membrane fraction (Mem) from  $\Delta ddcA$  *amyE::P<sub>xyt</sub>-ddcA-gfp* (PEB856) cell extracts using  
844 antisera against GFP (upper panel) or DdcP (lower panel). The asterisk denotes a cross-reacting  
845 species detected by the GFP antiserum.

846 **Figure S5 DdcA and YneA do not interact in bacterial two hybrid assay** Plasmids containing  
847 the indicated T18 (rows) and T25 (columns) fusions were used to co-transform *E. coli* BTH101  
848 cells, which were spotted onto LB containing X-gal and IPTG.

849 **Figure S6 DdcP and CtpA PDZ domains have different functions *in vivo*** **(A)** Alignment of  
850 the PDZ domain of DdcP to the PDZ domains of DegP and DegS from *E. coli*. **(B)** Alignment of  
851 the PDZ domain of CtpA to the PDZ domains of CtpB from *B. subtilis* and Prc from *E. coli*. **(C)**  
852 Schematics of  $\Delta$ PDZ constructs used in panels B and C. **(D)** Spot titer assay using *B. subtilis*  
853 strains WT (PY79),  $\Delta ddcP$  (PEB324), *ddcP* $\Delta$ PDZ (PEB774),  $\Delta ctpA$  (PEB355), and *ctpA* $\Delta$ PDZ  
854 (PEB776) media. **(E)** Western blot analysis of WT (PY79), *ddcP* $\Delta$ PDZ (PEB774), and  
855 *ctpA* $\Delta$ PDZ (PEB776) cell lysates using DdcP, CtpA, and DnaN antiserum.

856 **Supplemental text containing supplemental tables, results, and methods.**

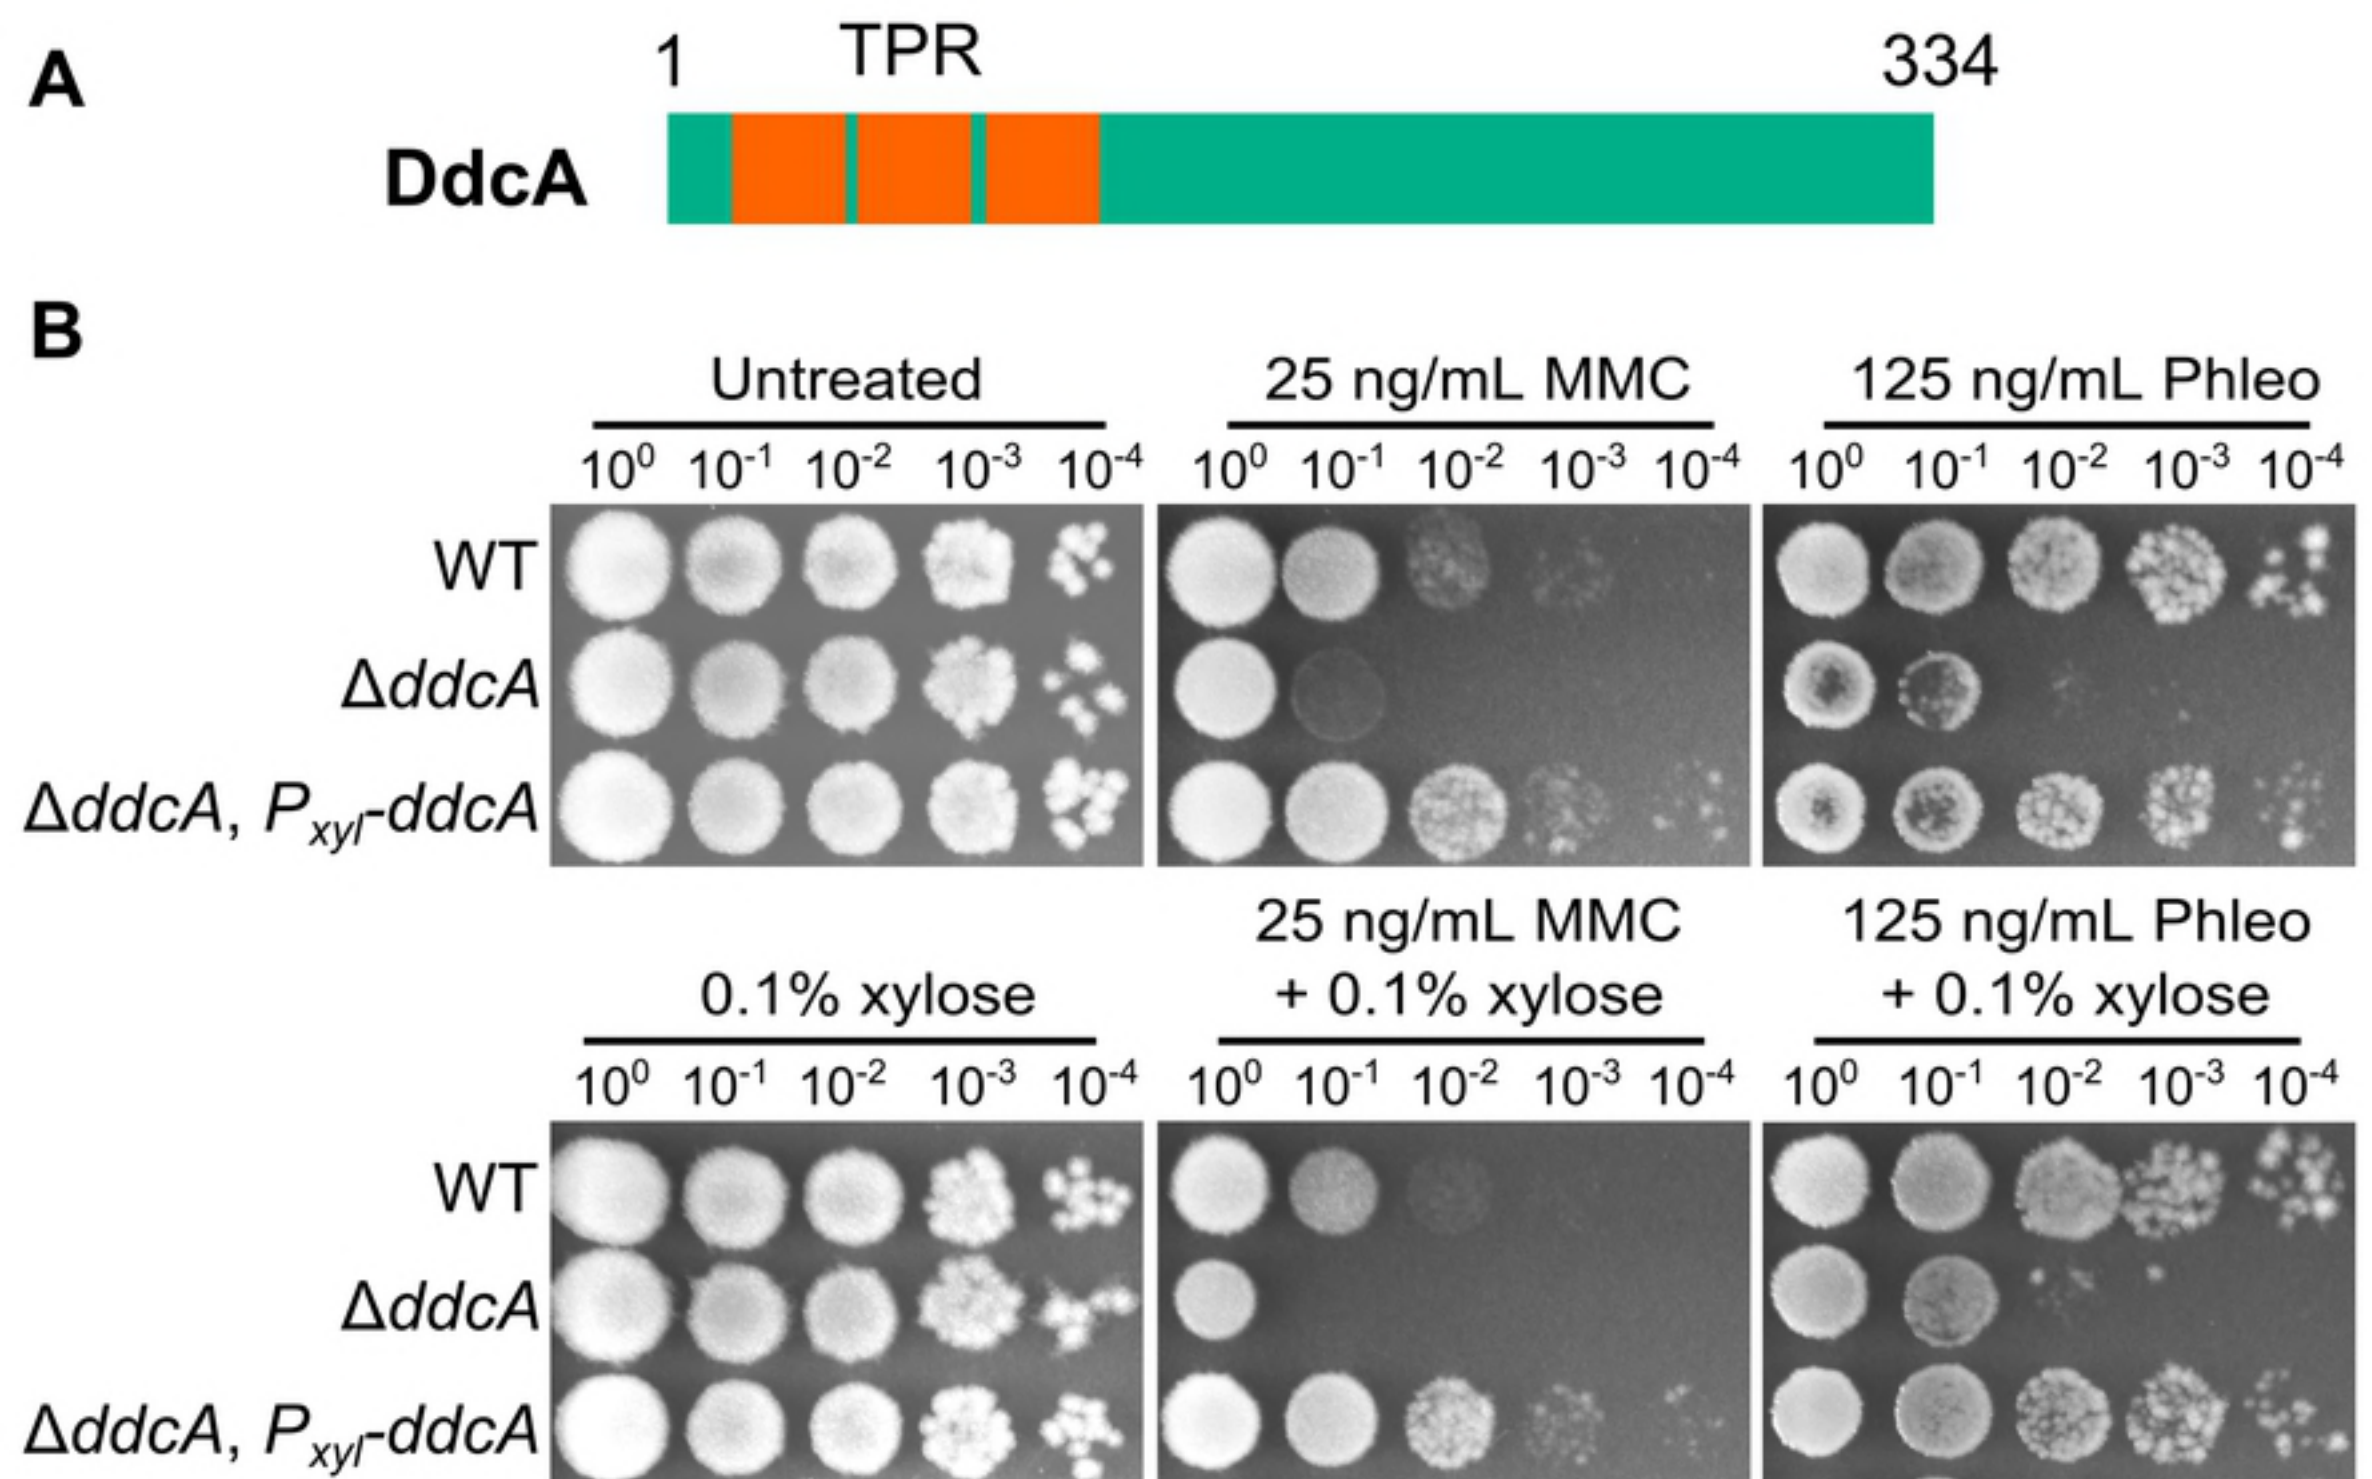

**A**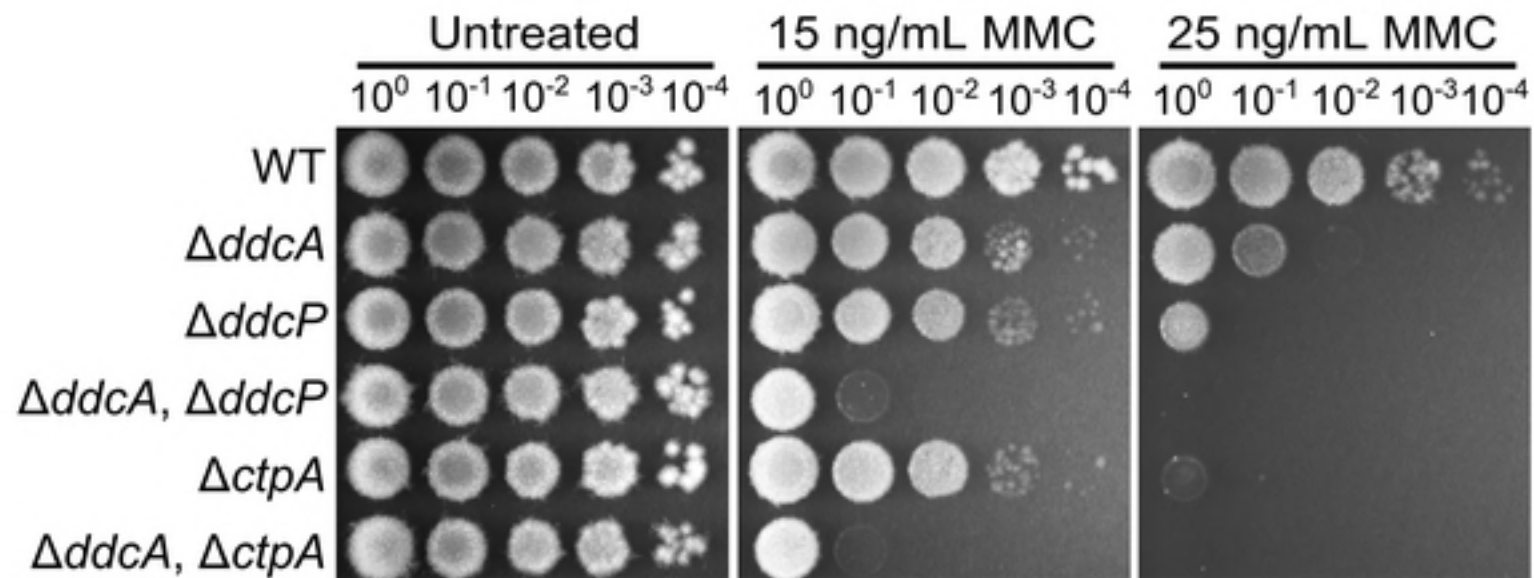**B**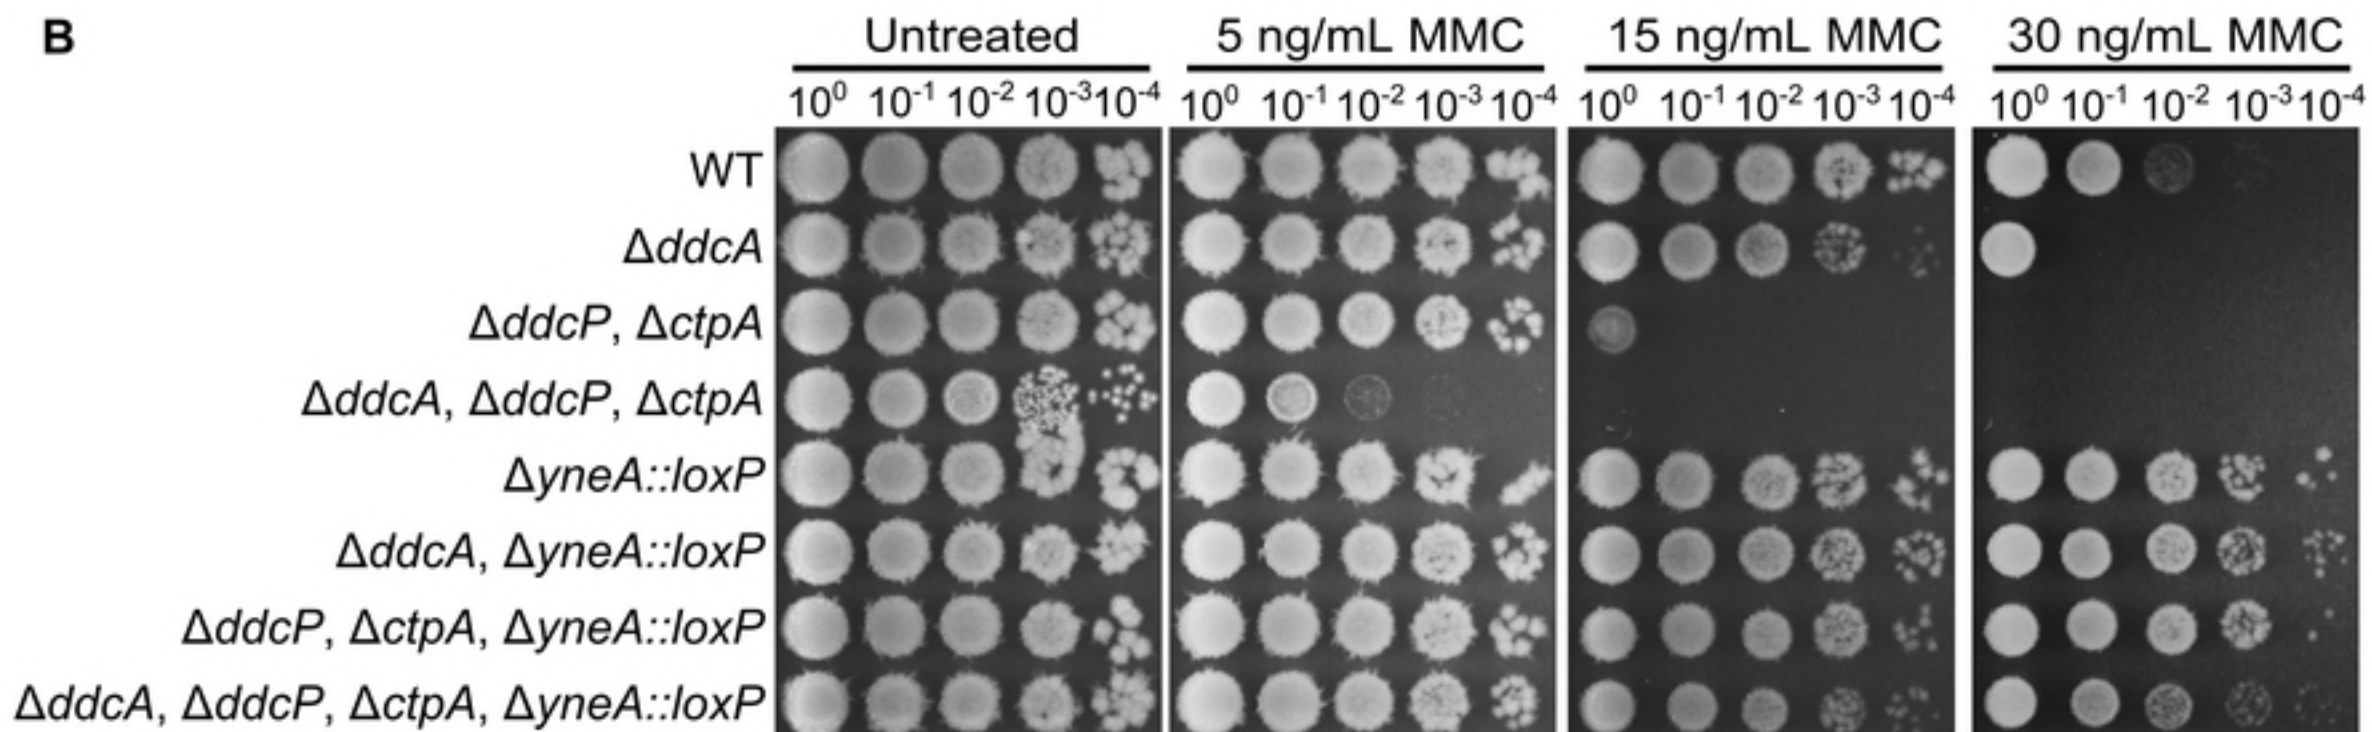



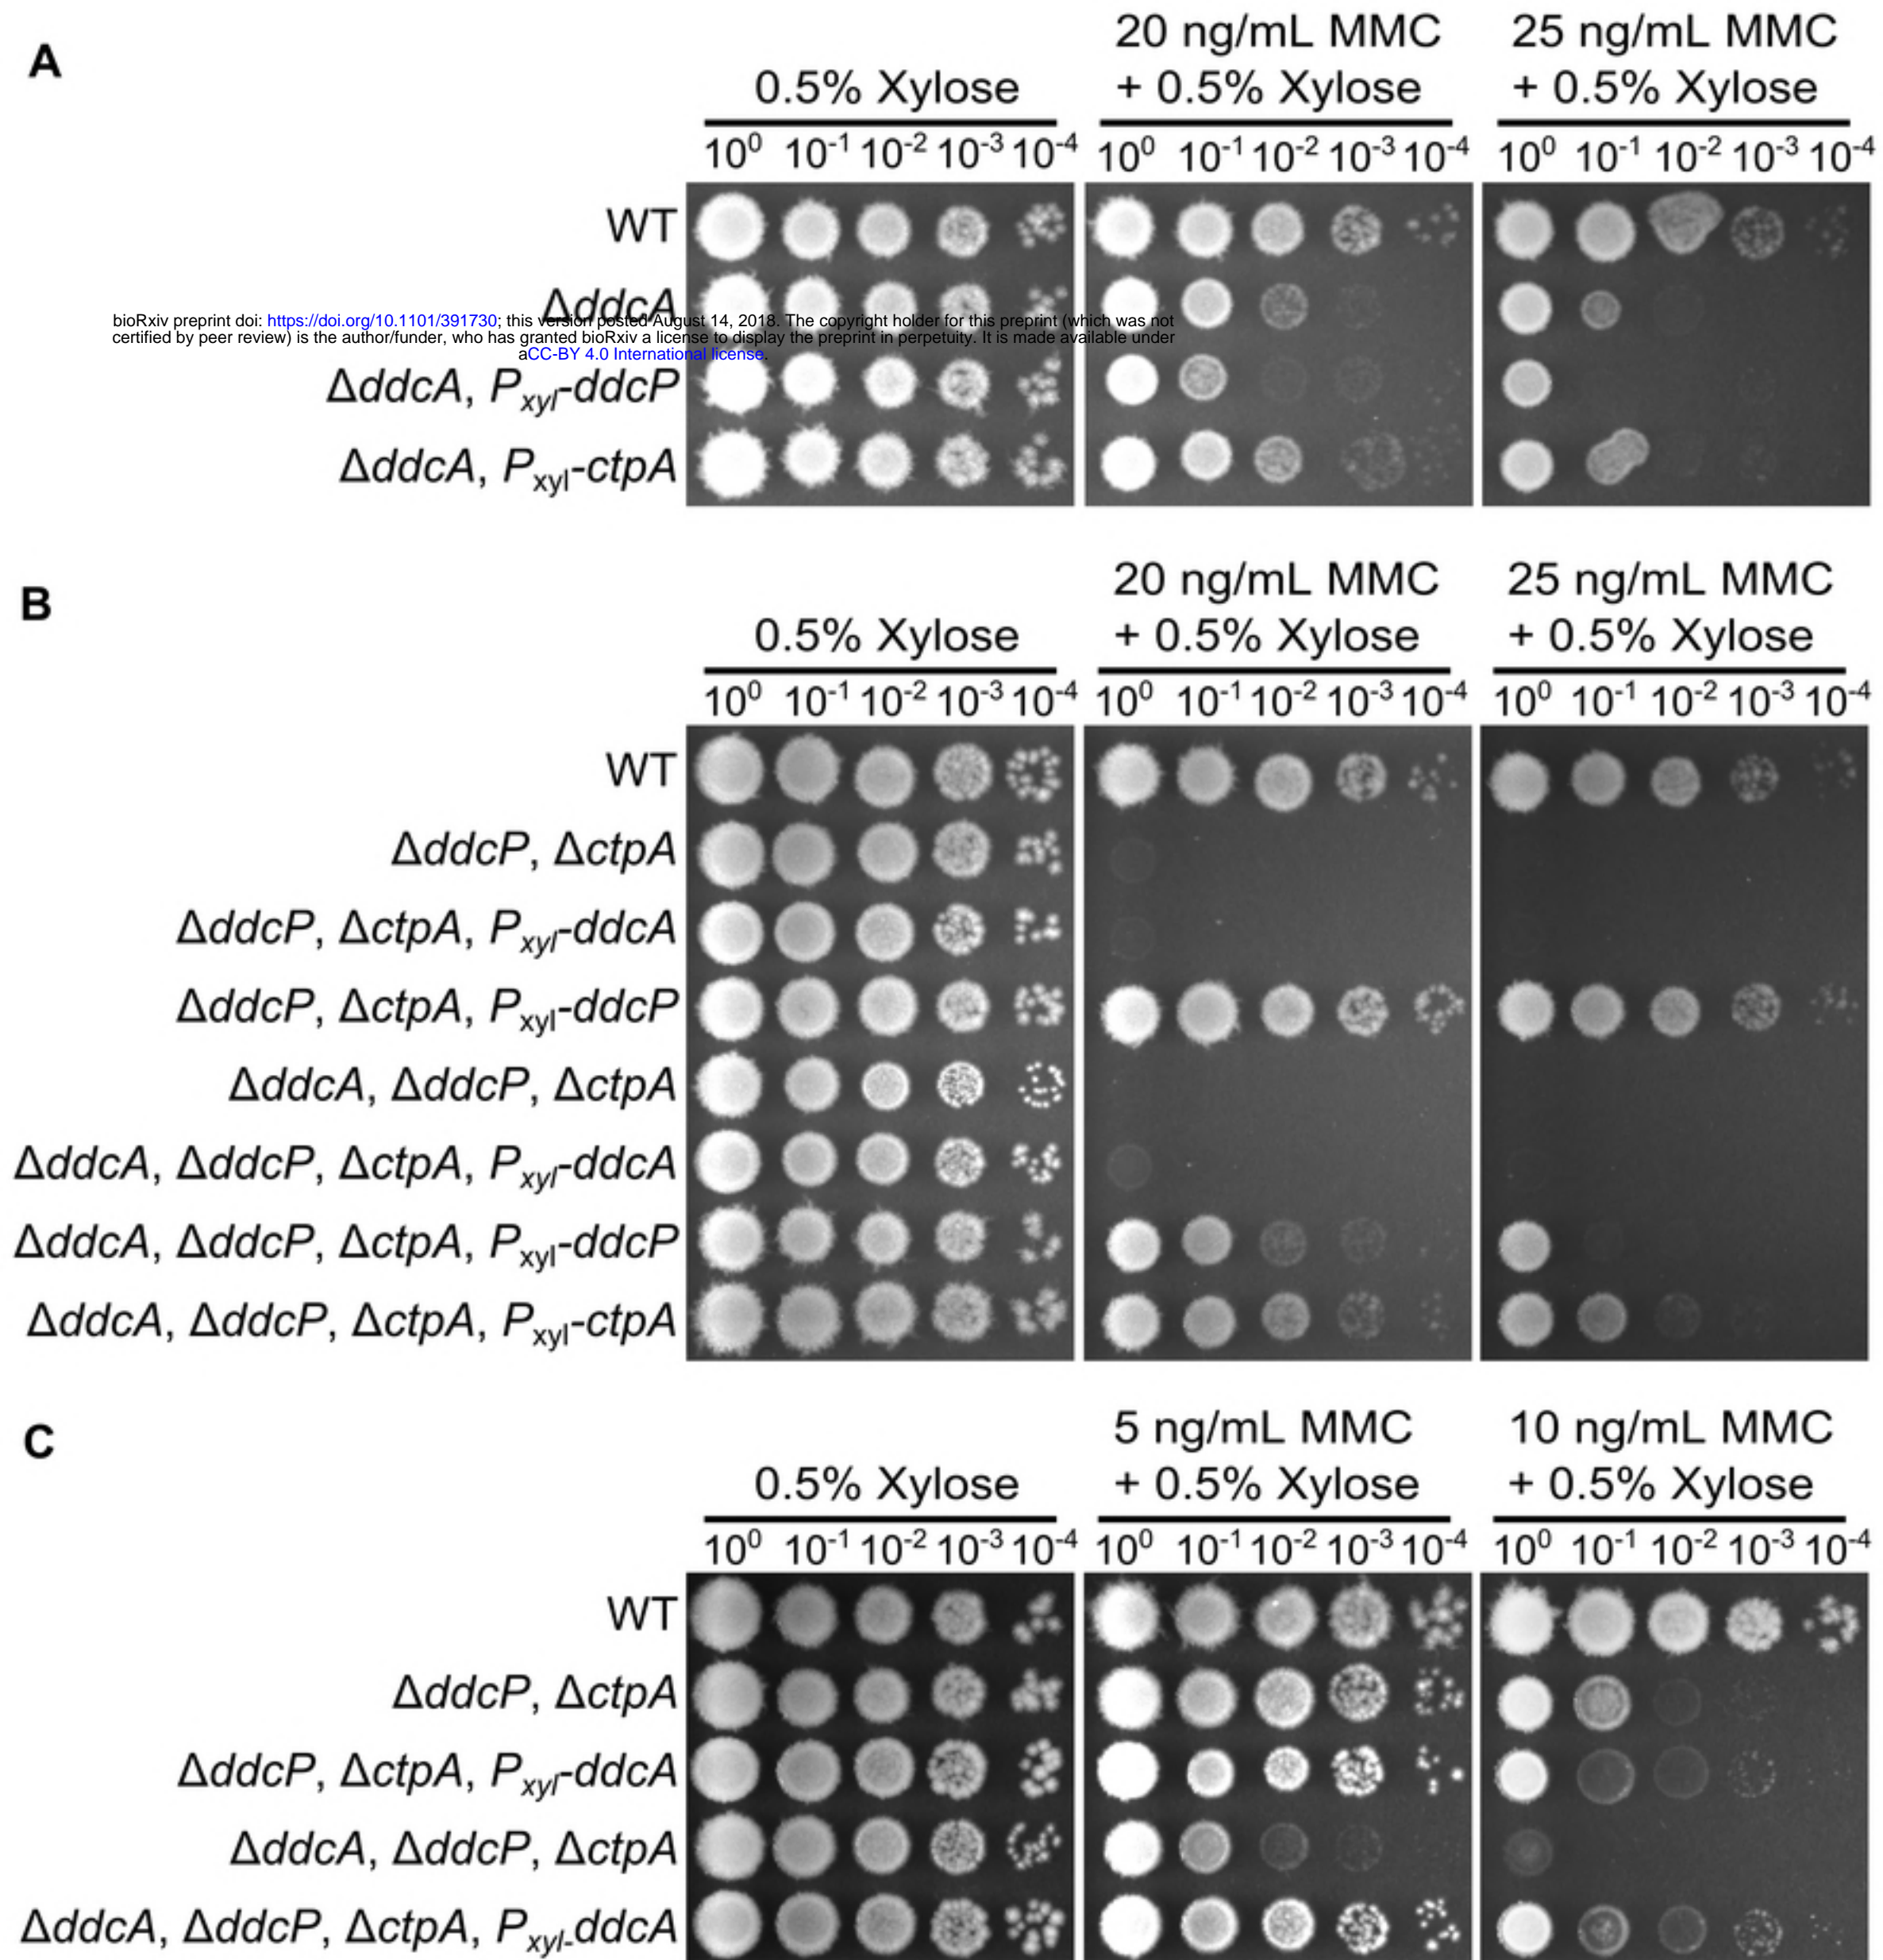

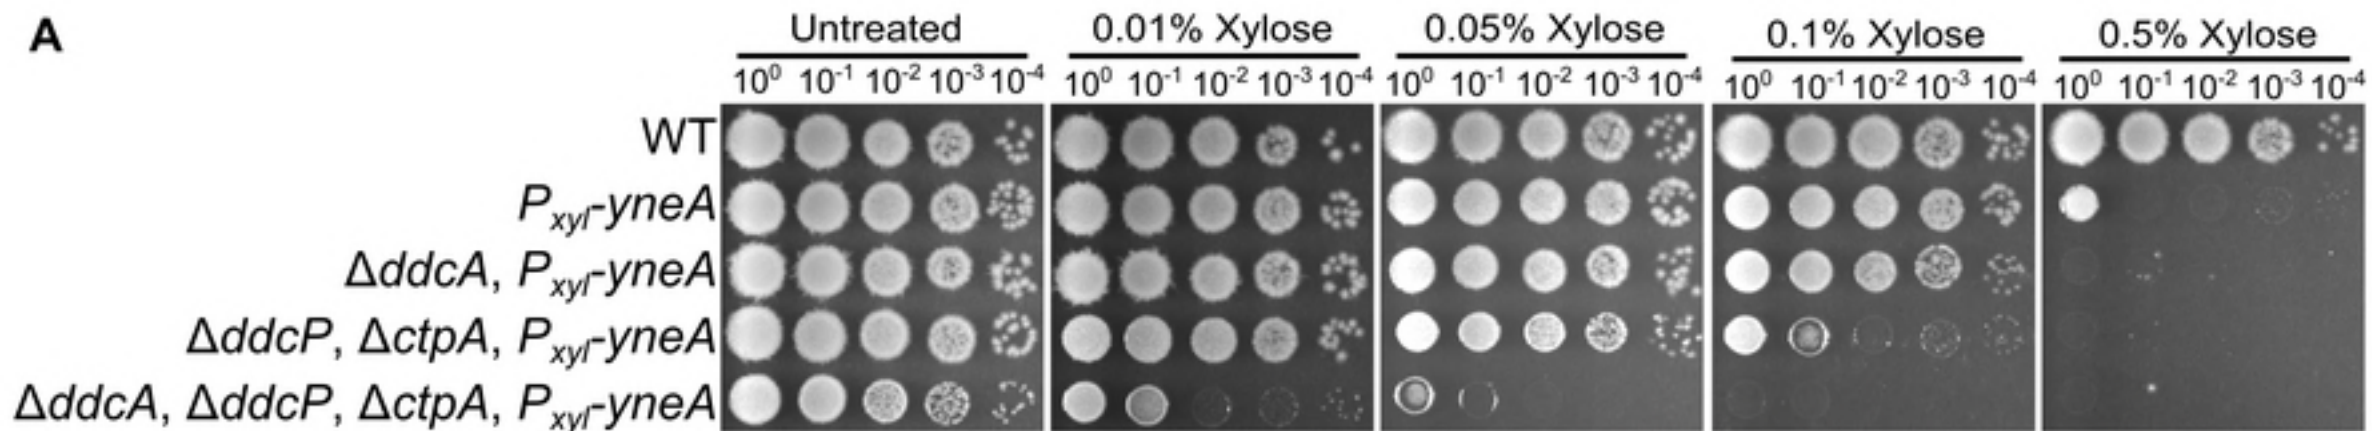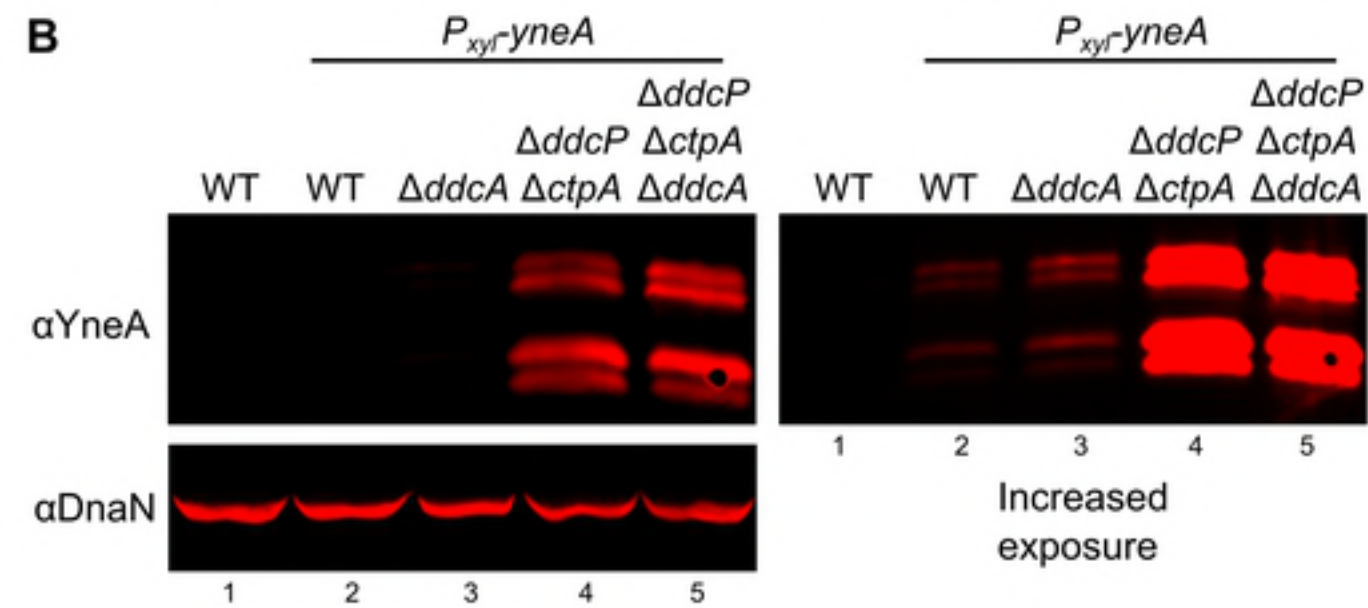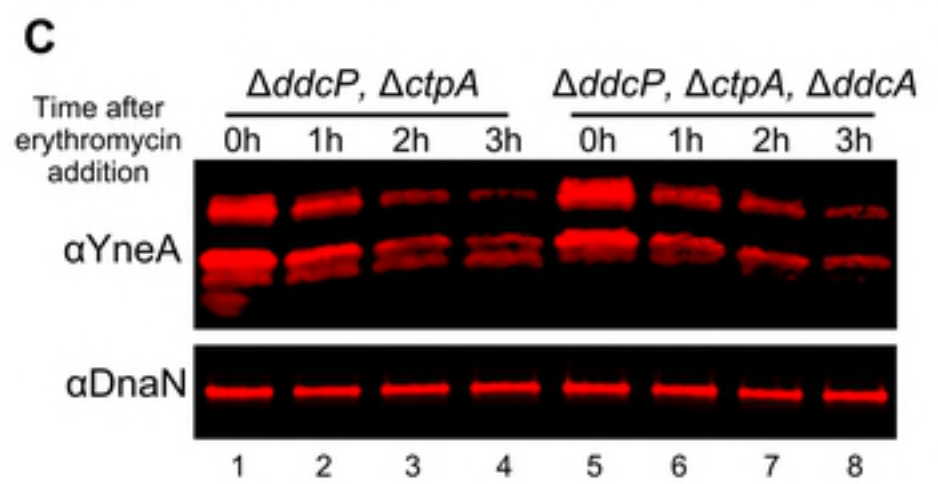



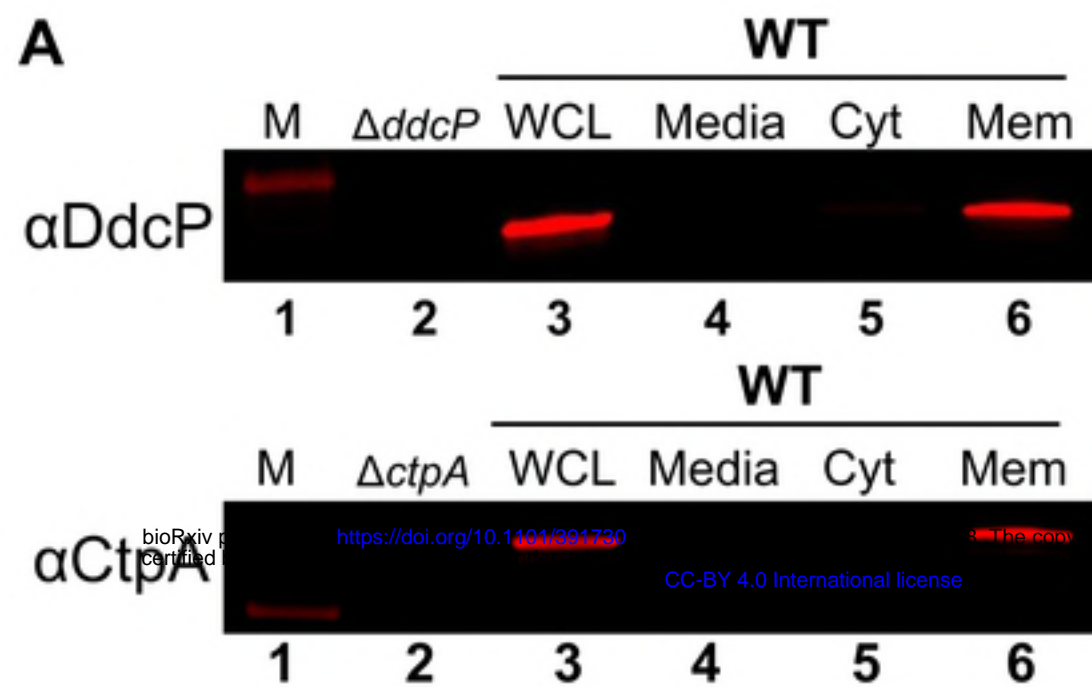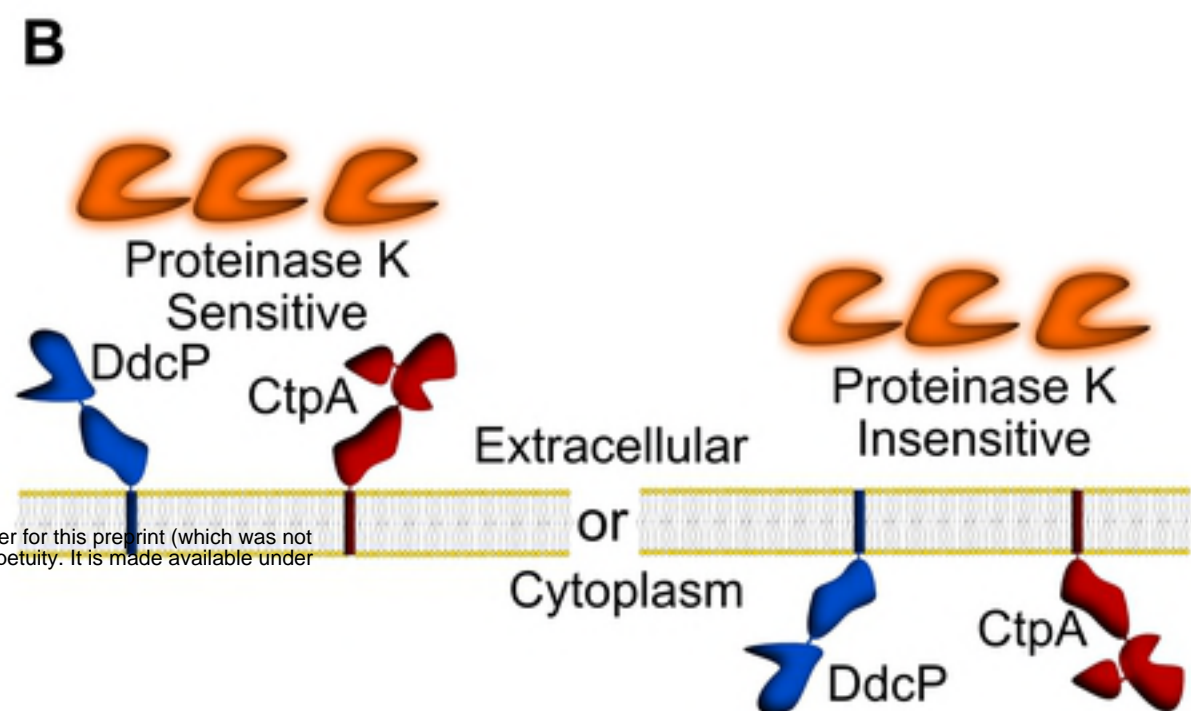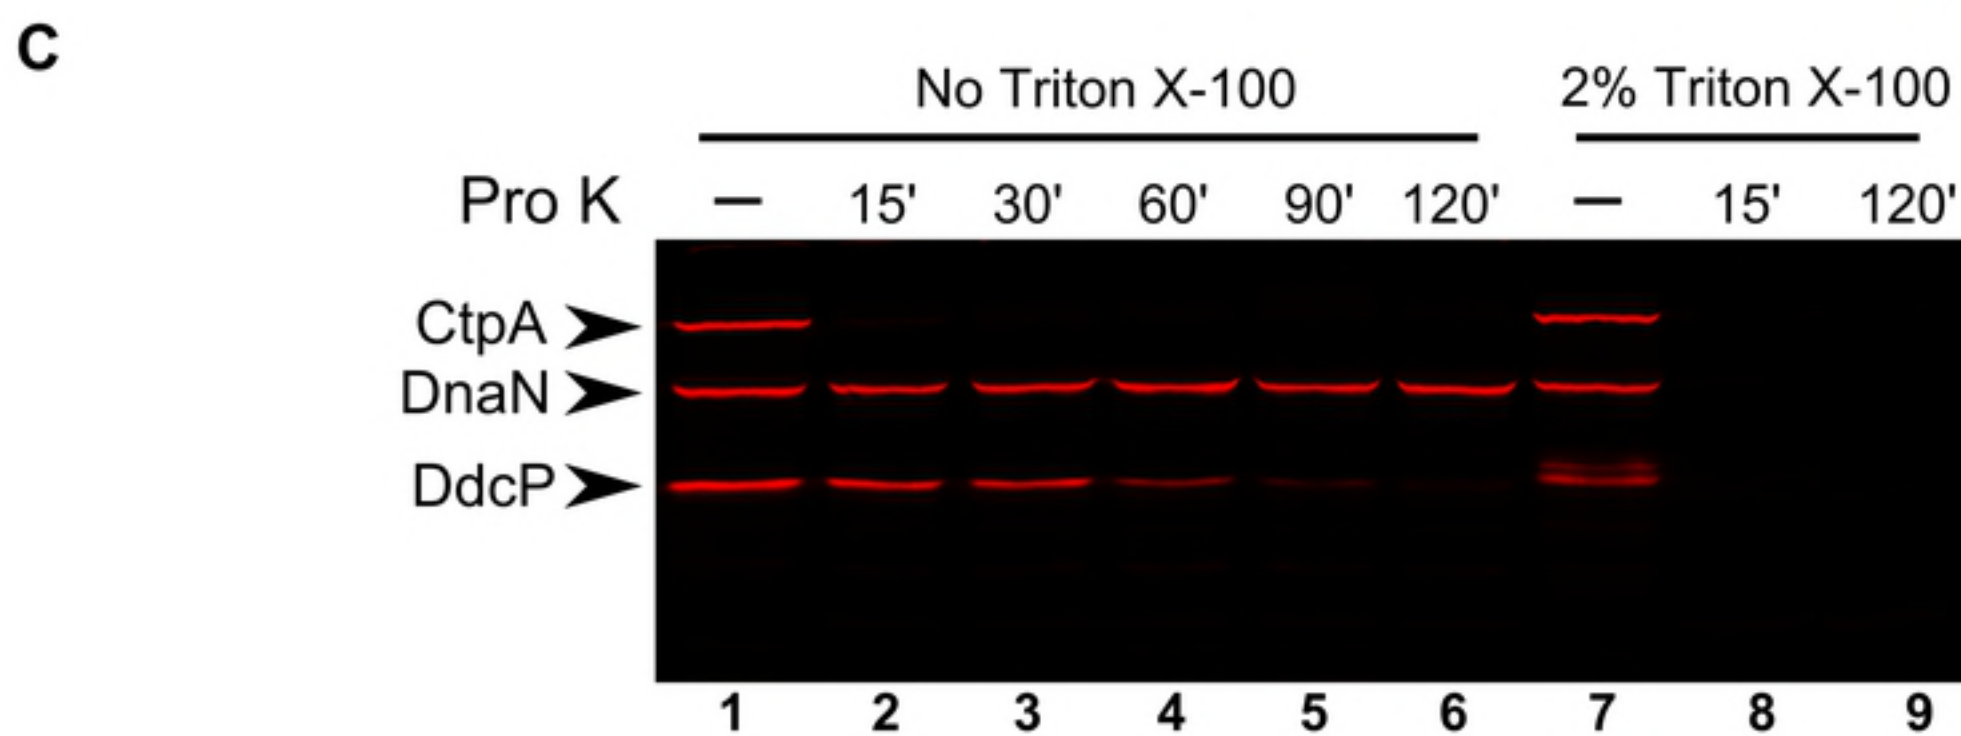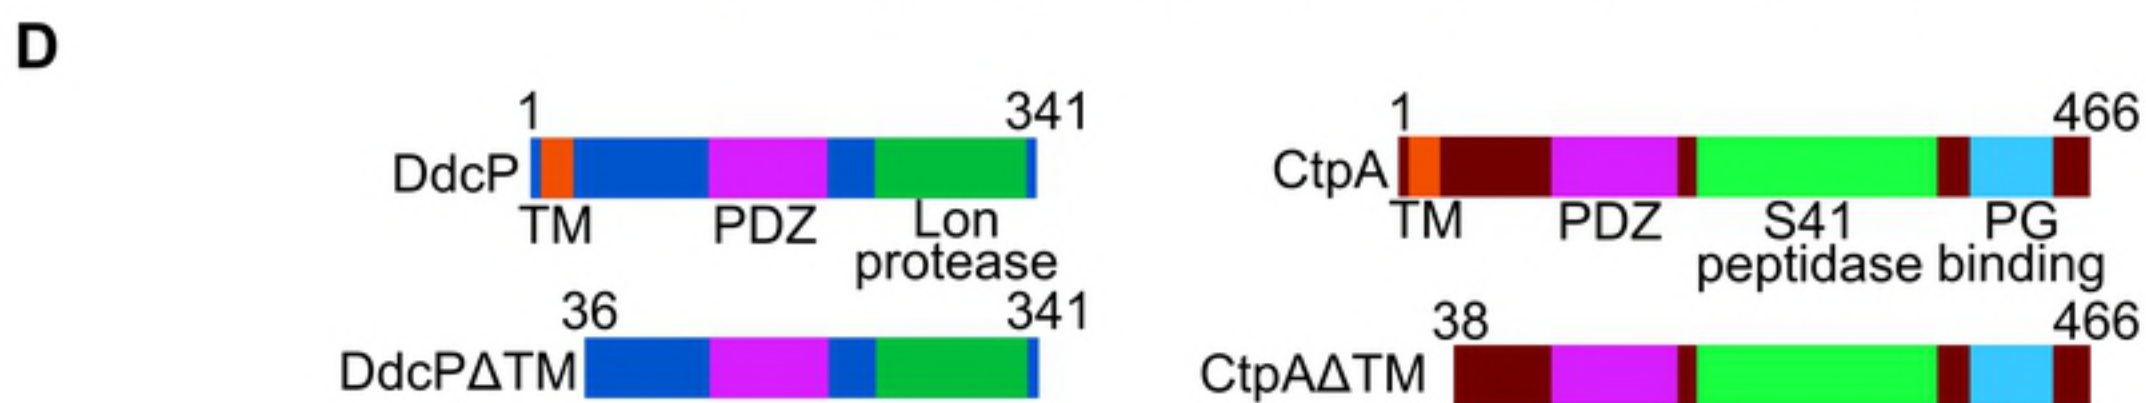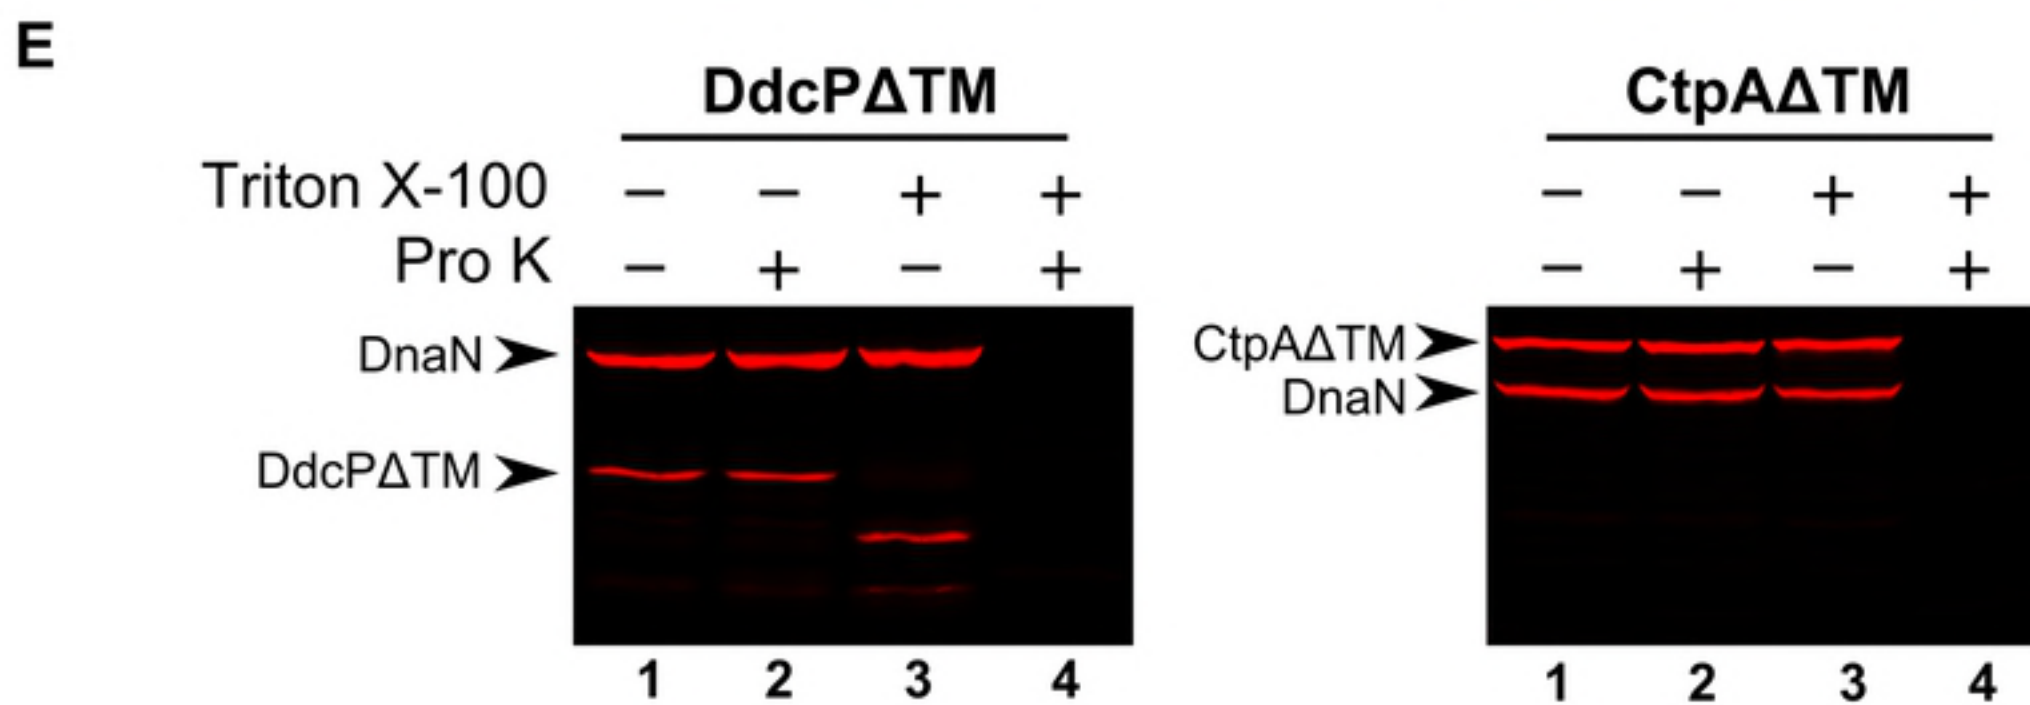



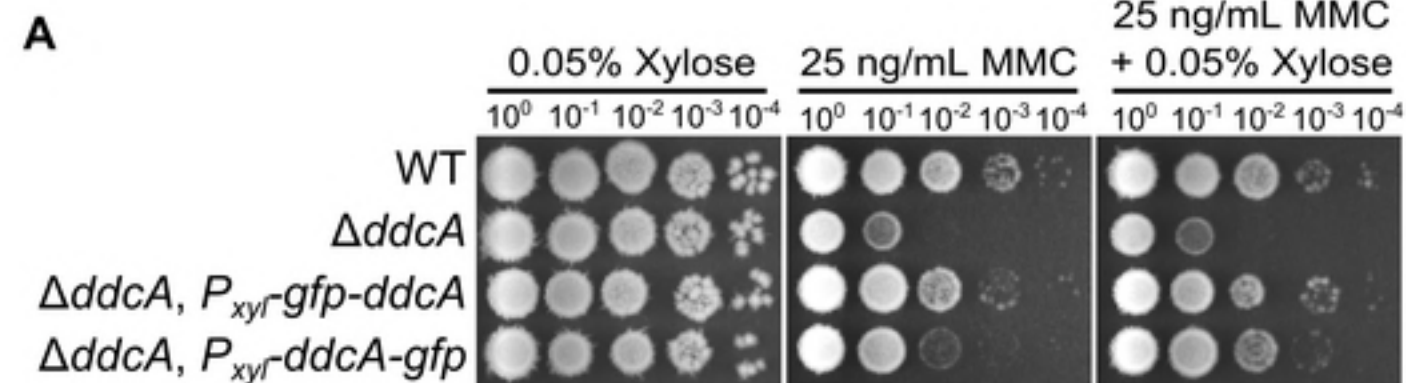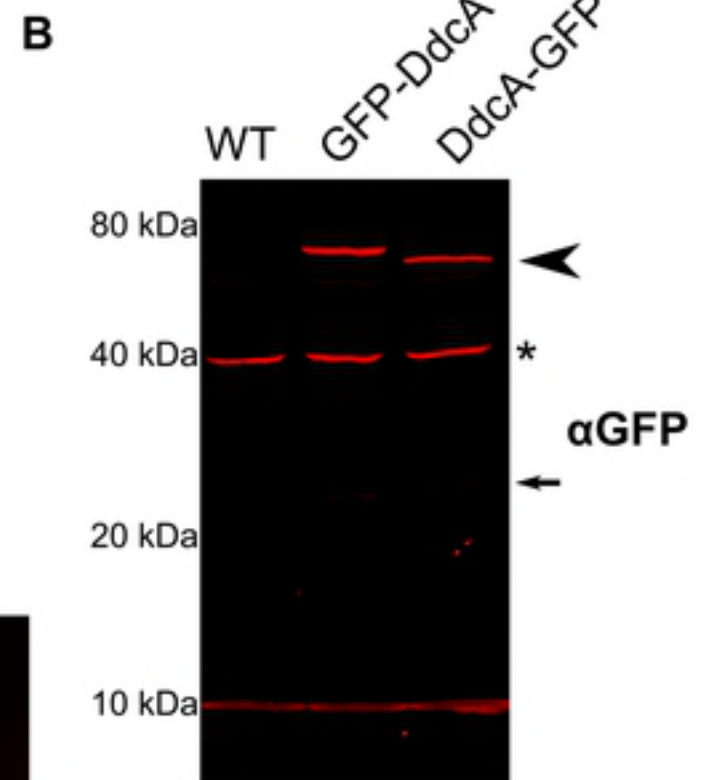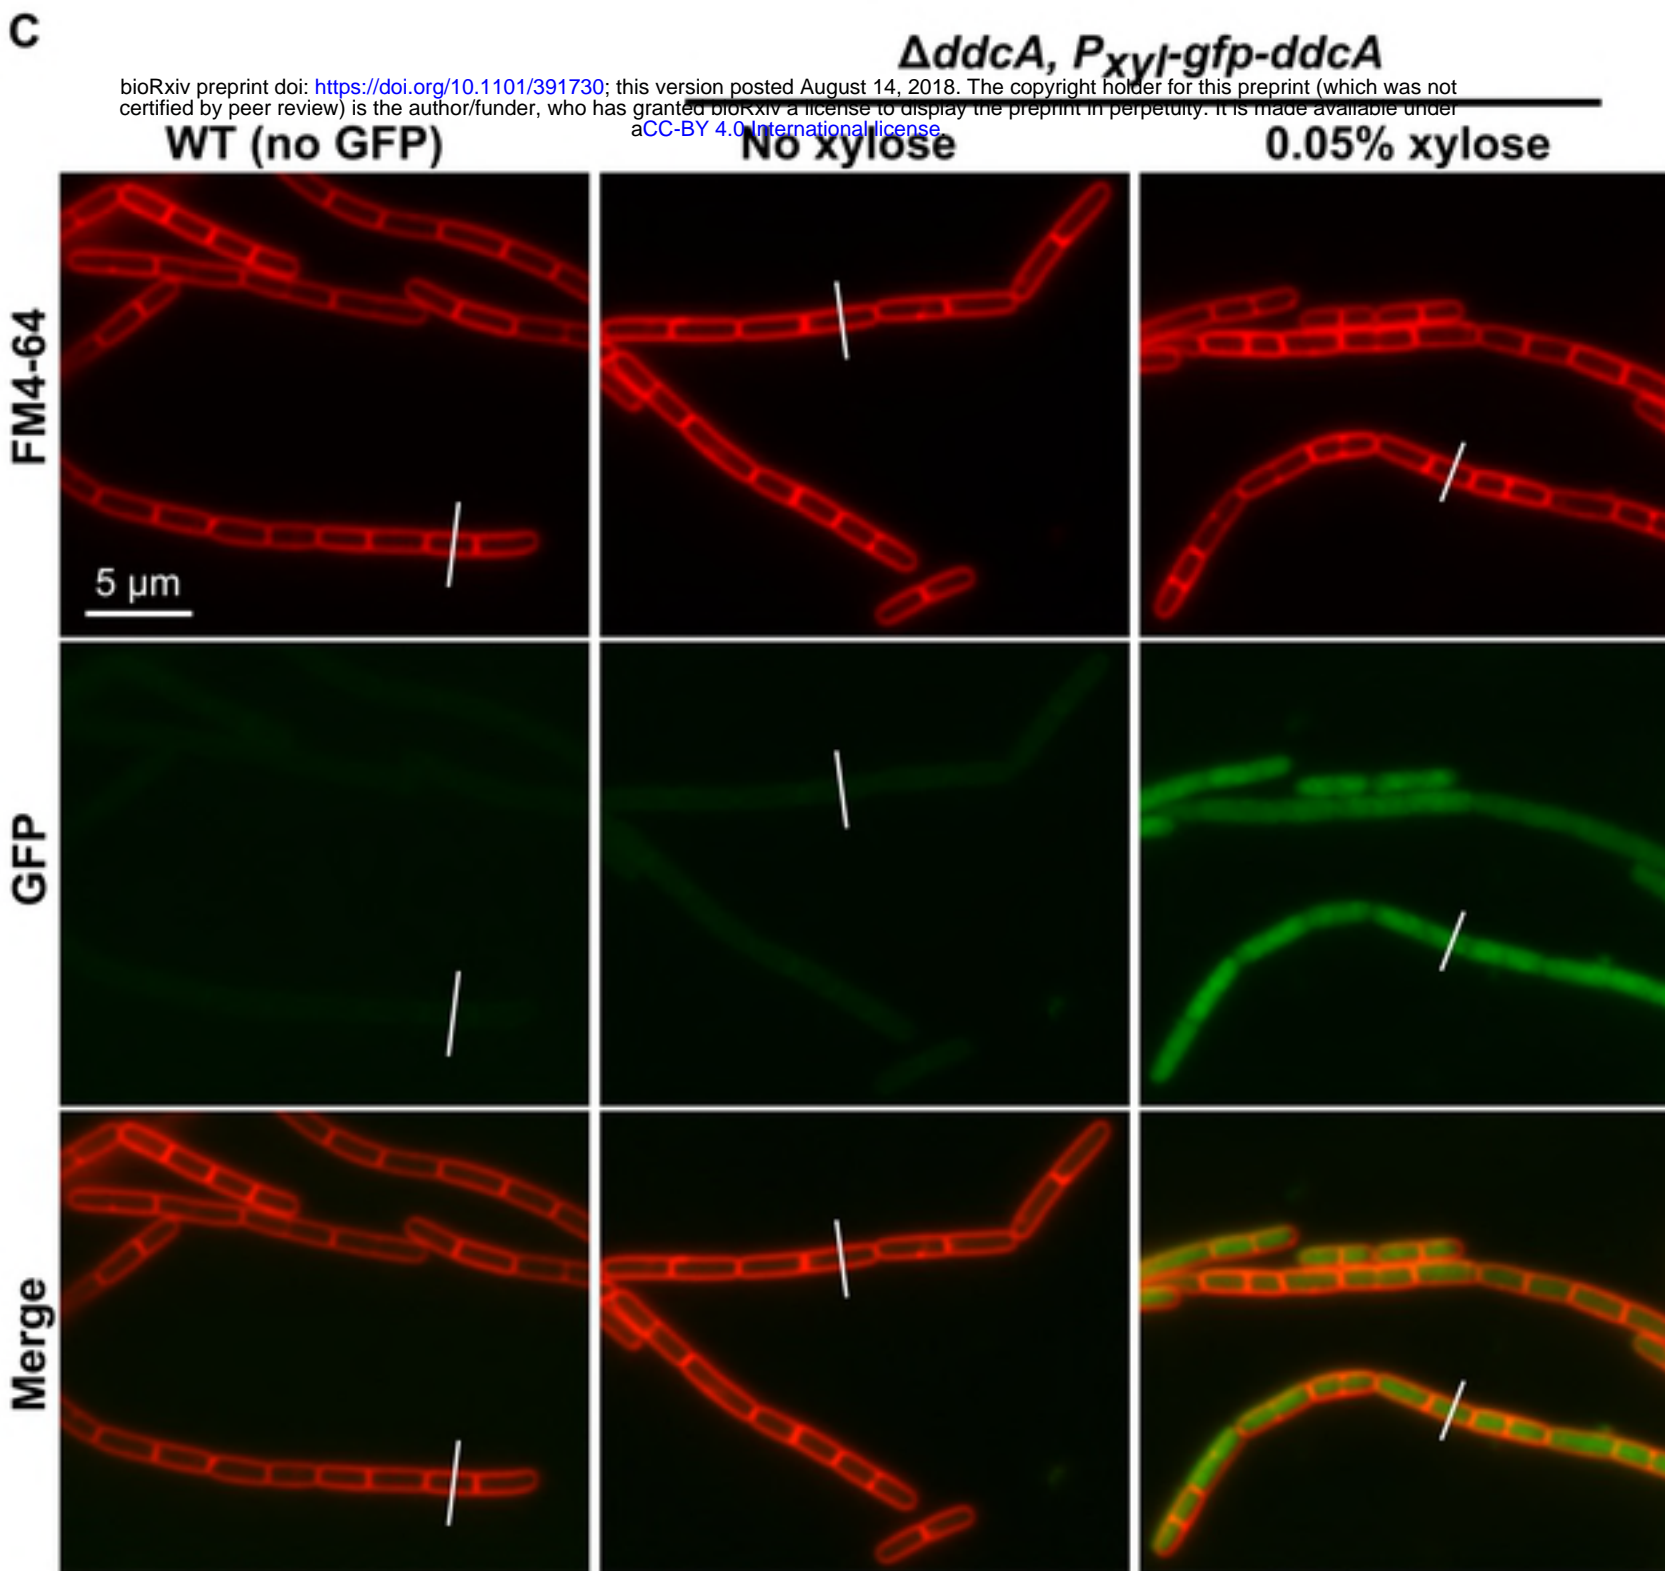

bioRxiv preprint doi: <https://doi.org/10.1101/391730>; this version posted August 14, 2018. The copyright holder for this preprint (which was not certified by peer review) is the author/funder, who has granted bioRxiv a license to display the preprint in perpetuity. It is made available under aCC-BY 4.0 International license.

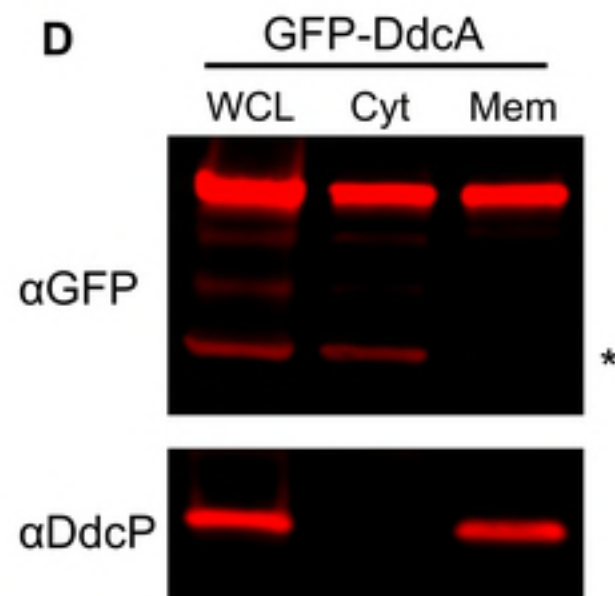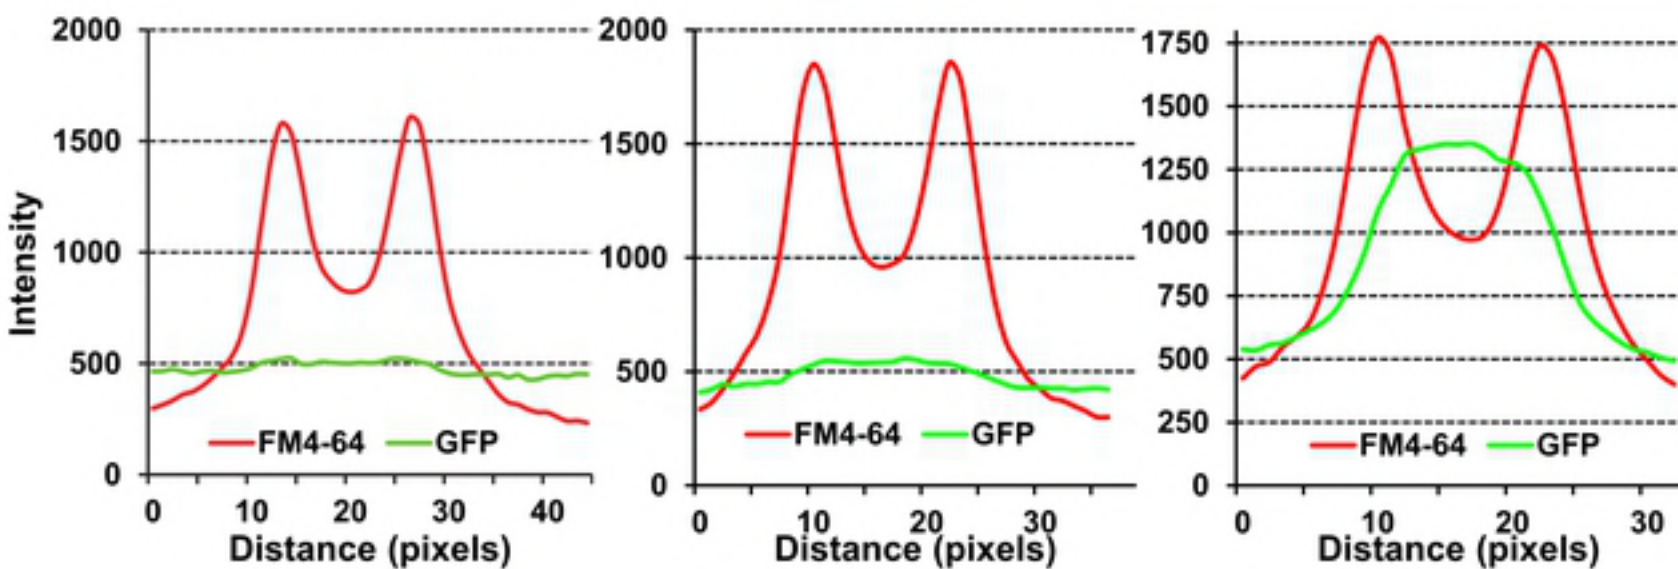



A

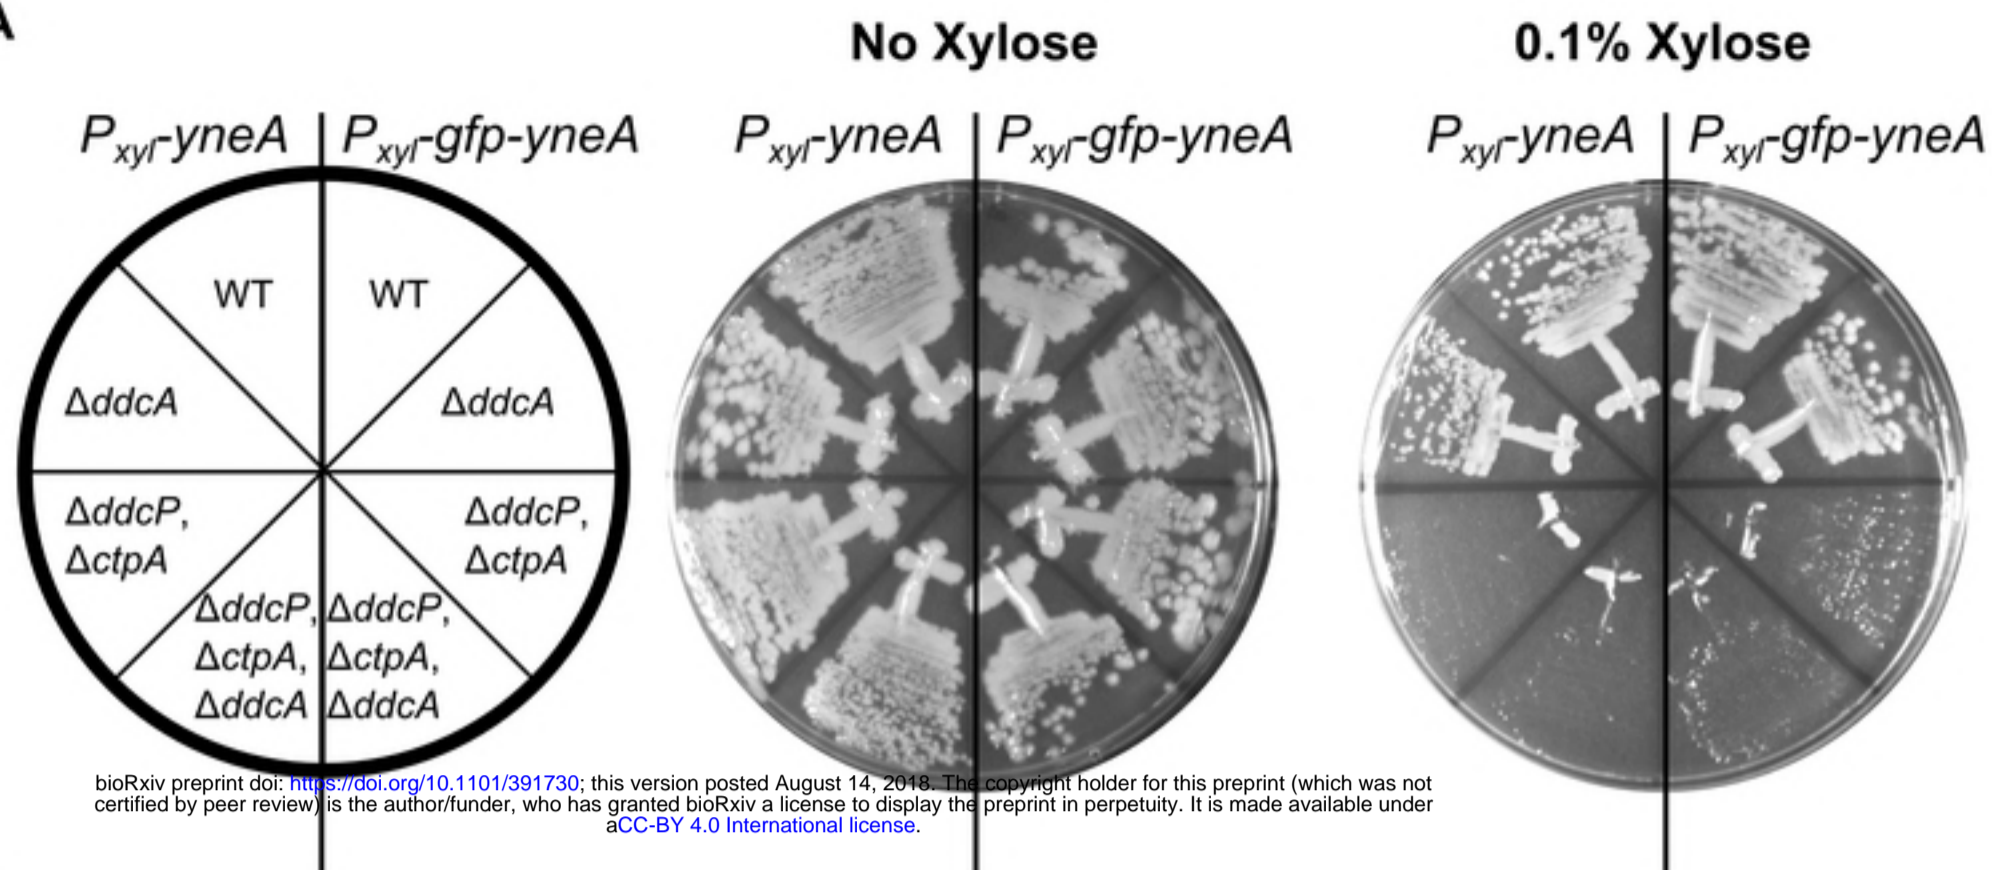

B

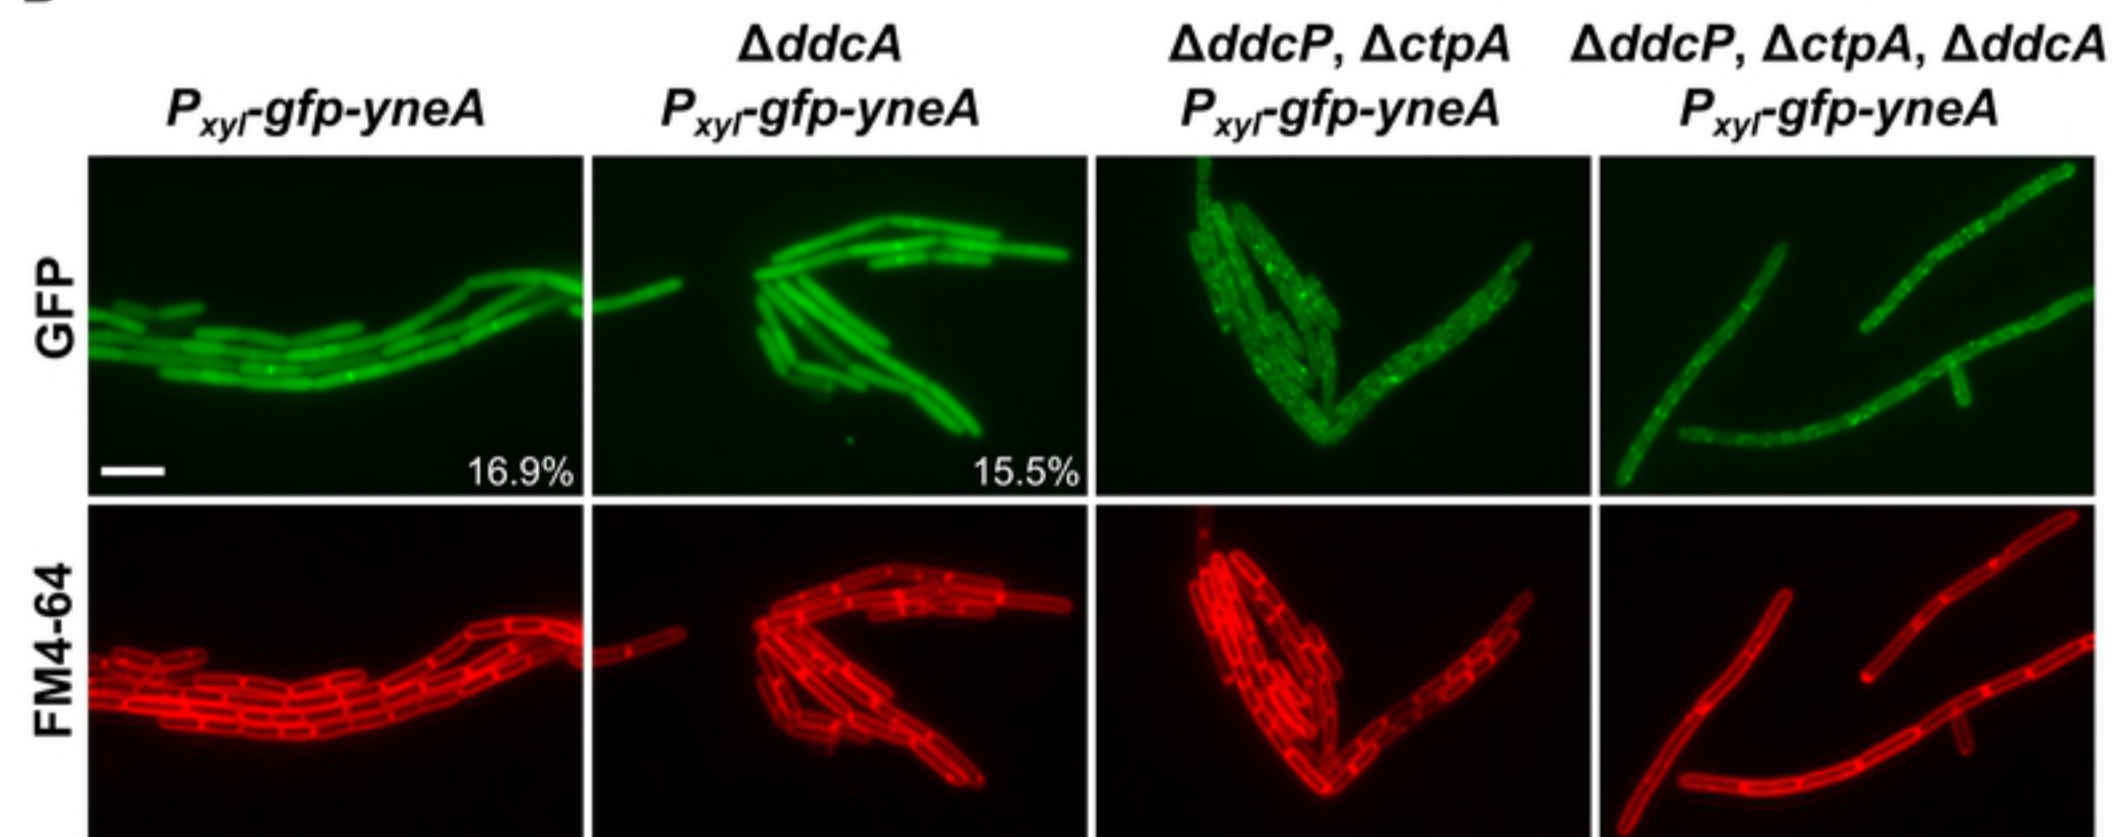

C

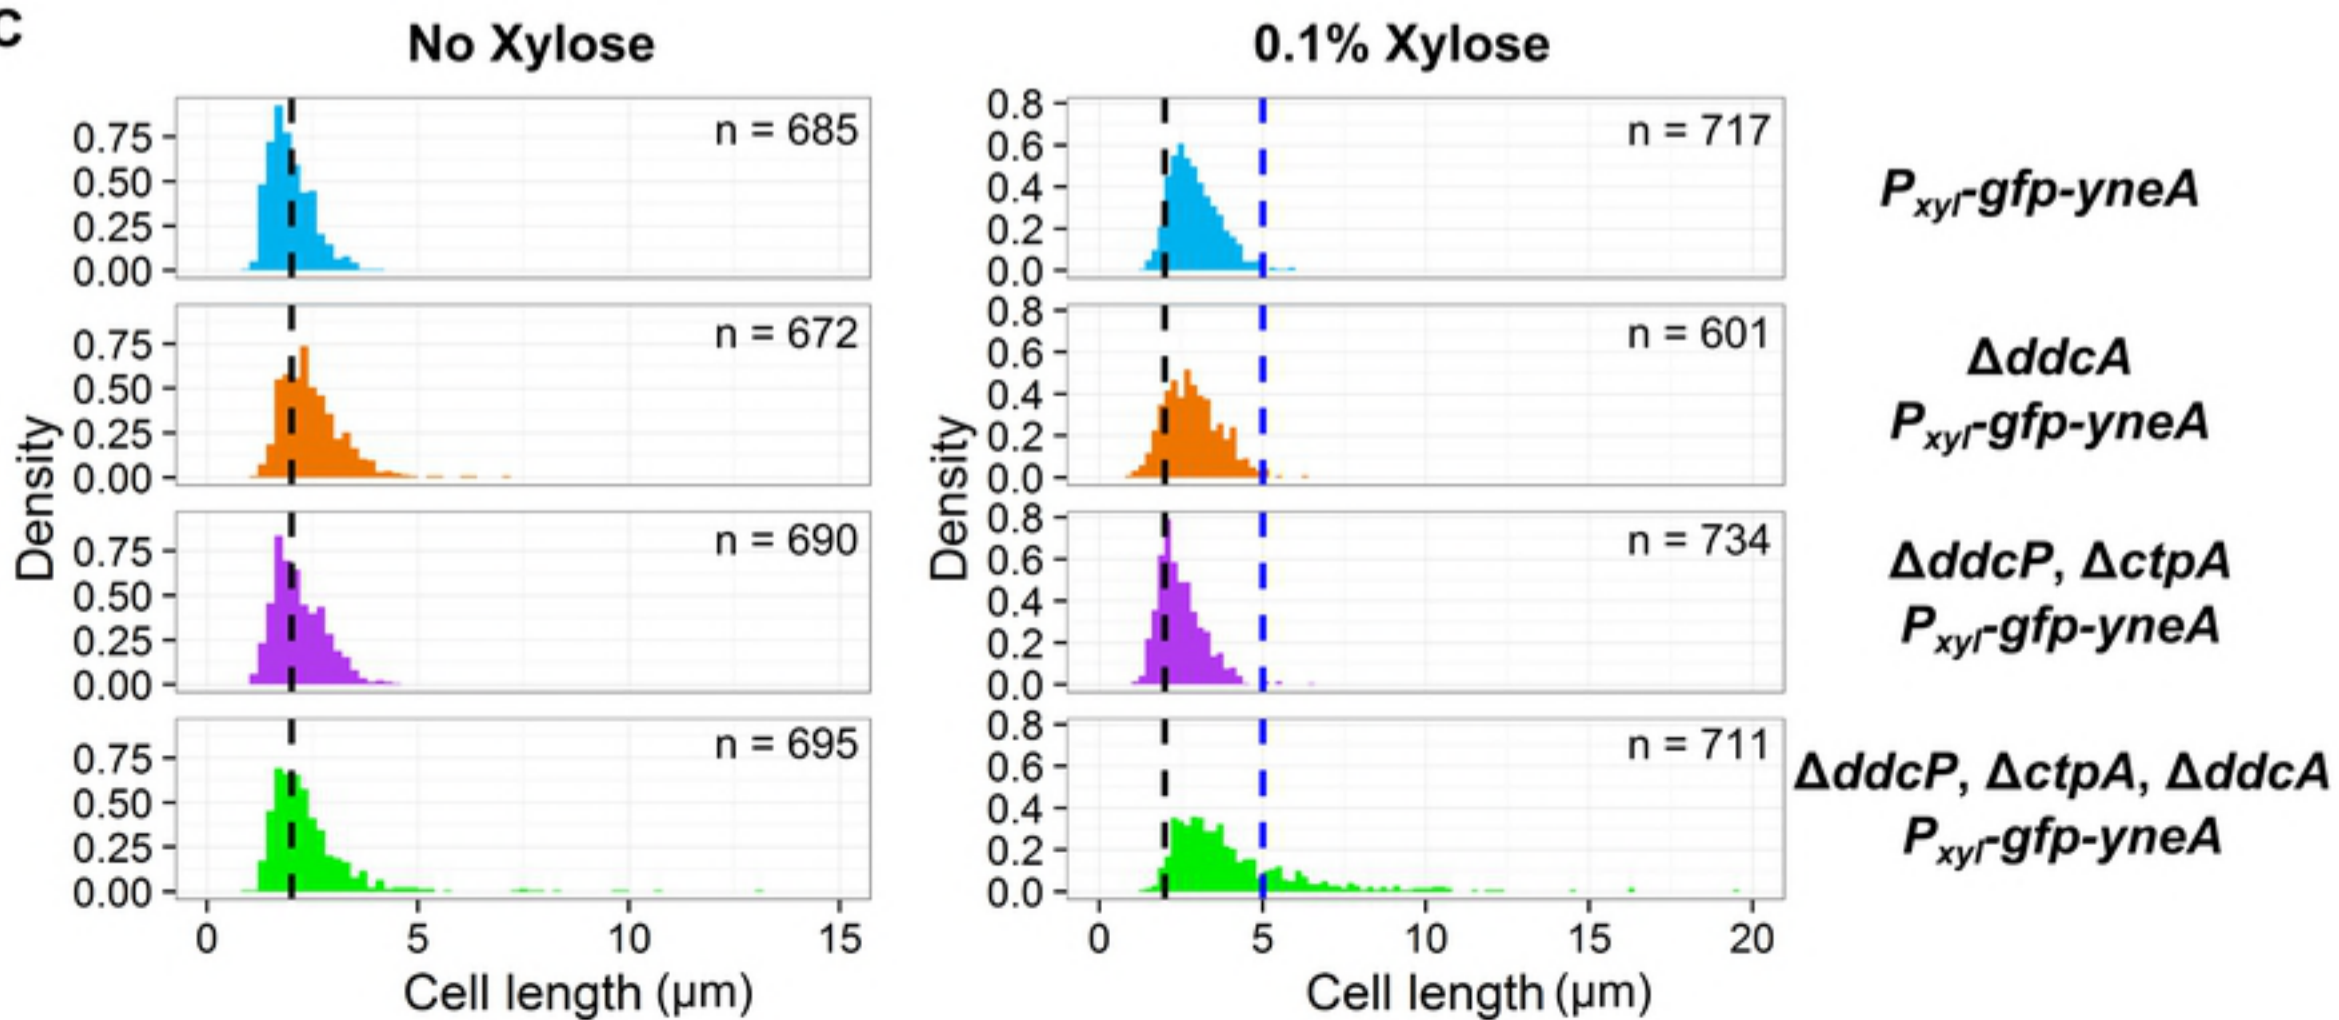



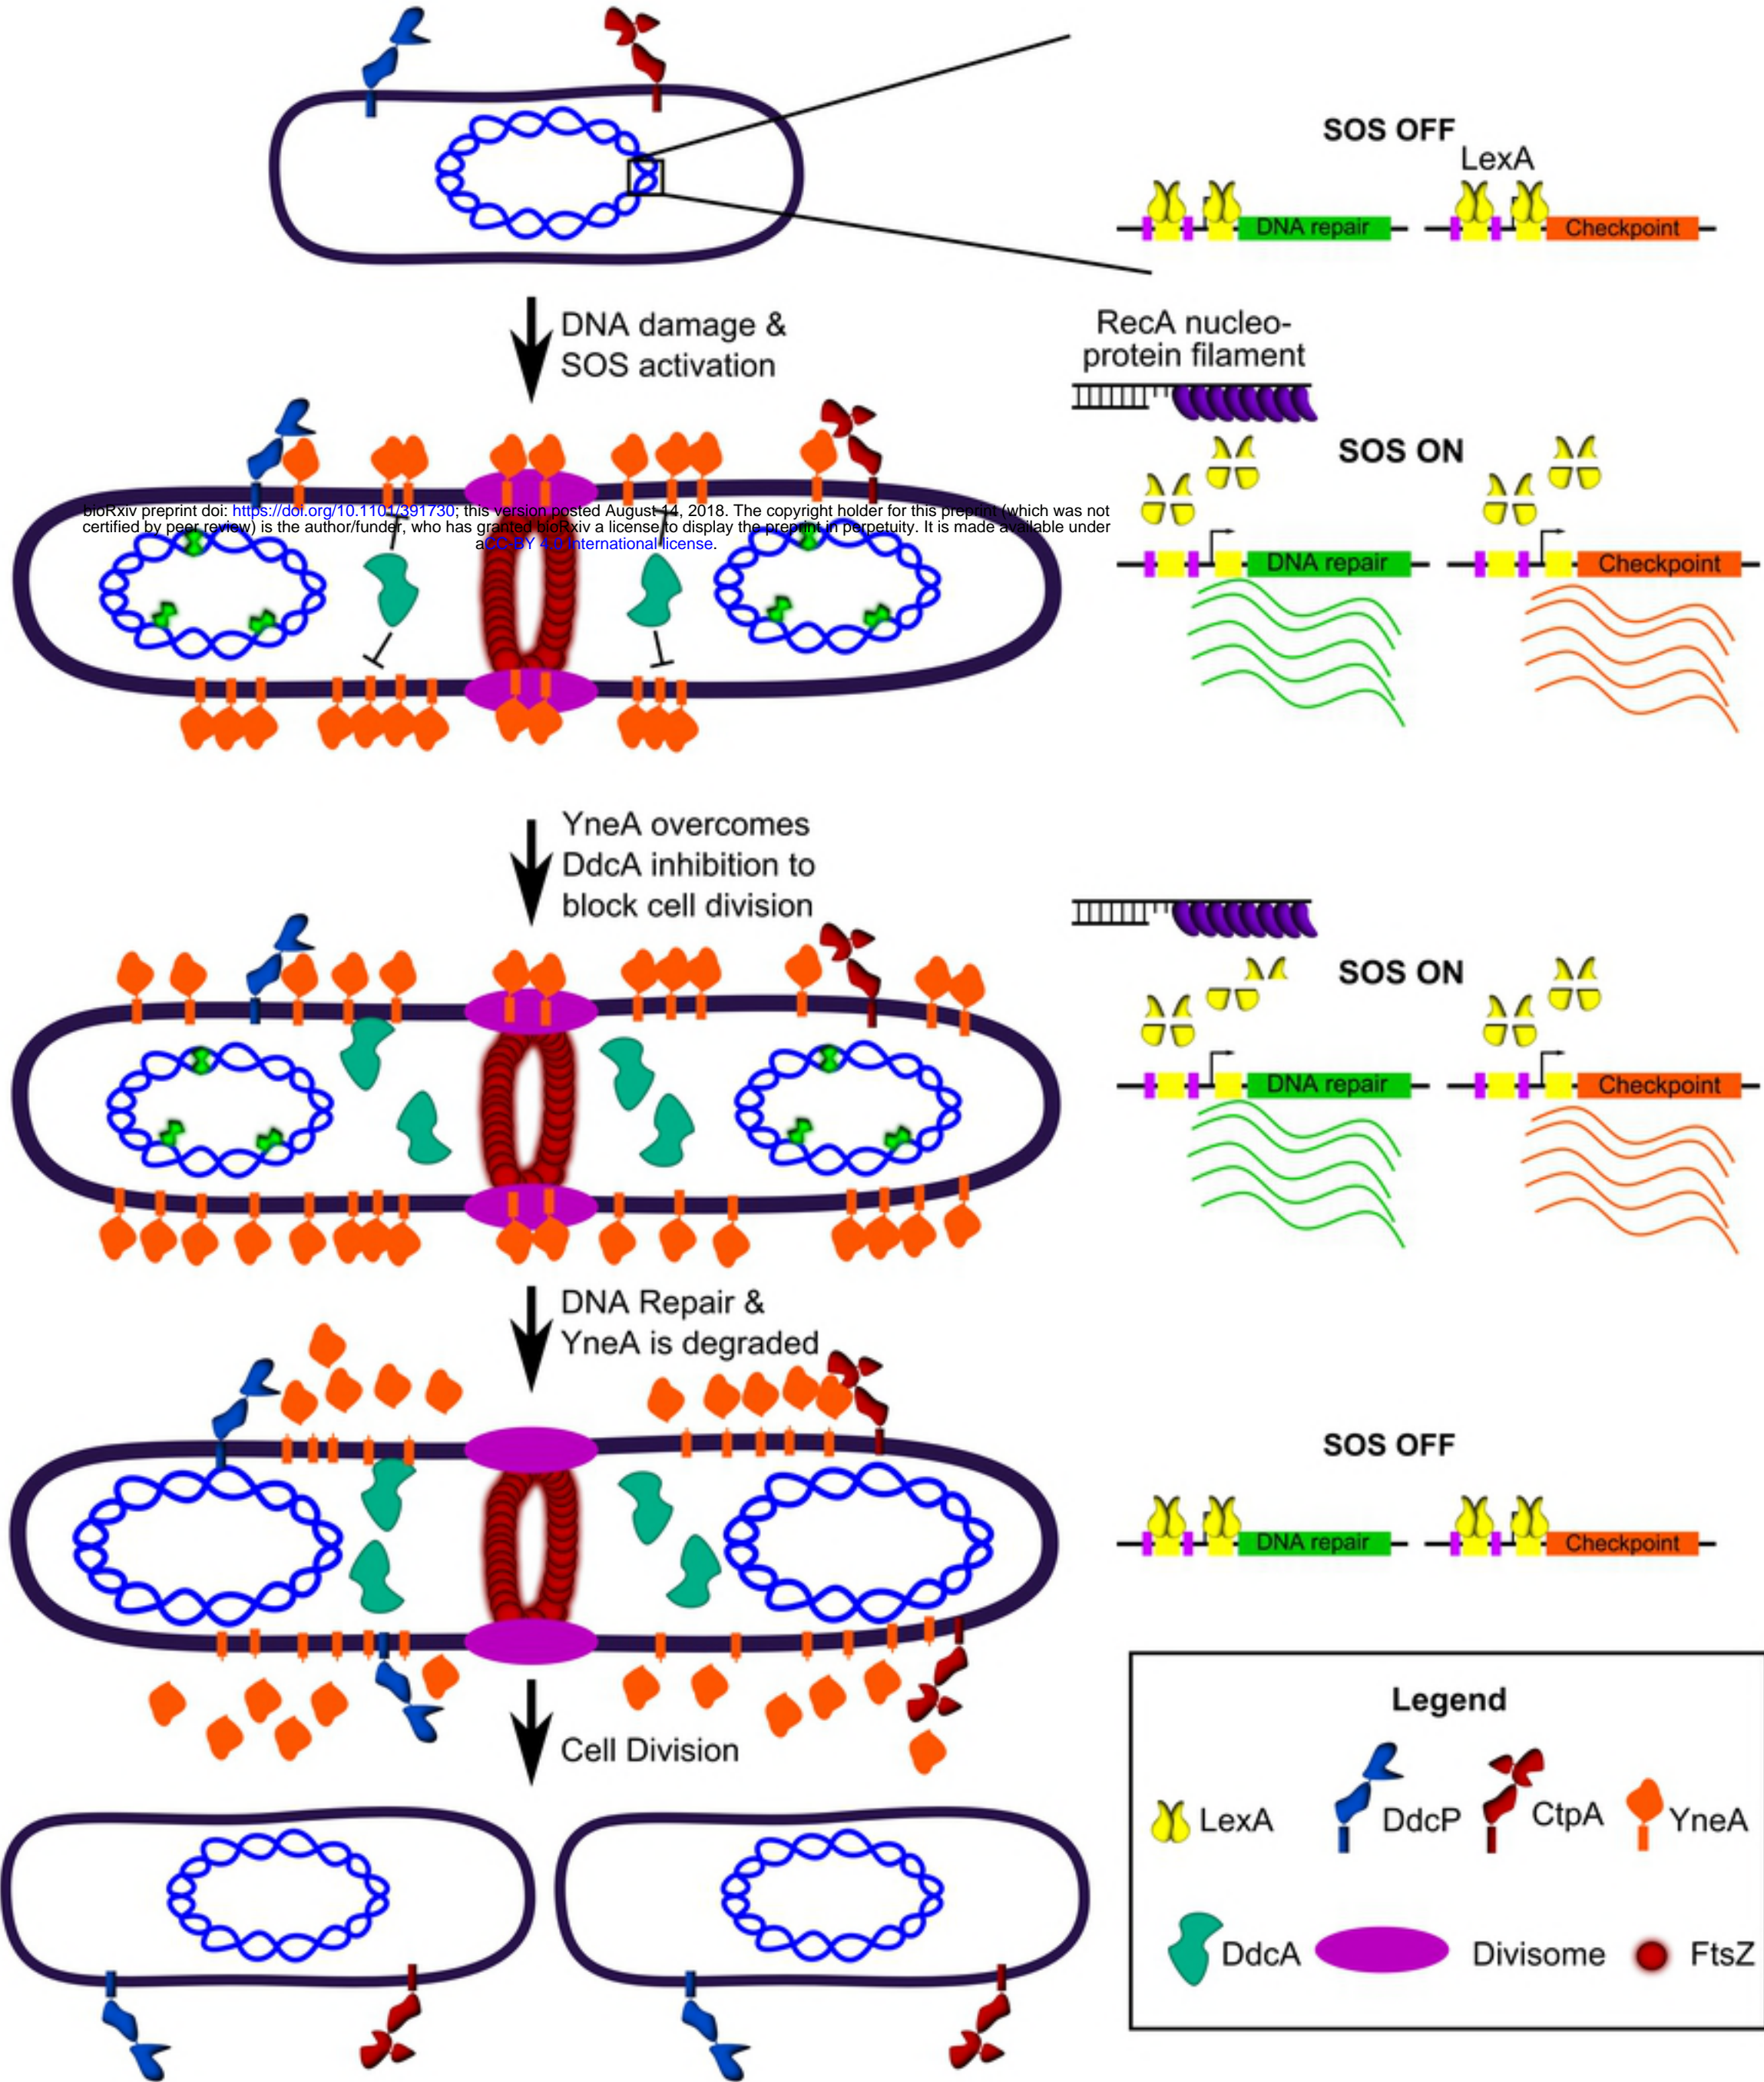

Source: https://www.biorxiv.org/content/10.1101/391730v1.full.pdf
